# Supplementary material
Source: Royal Society of Chemistry journal article supplement (doi:10.1039/d5em01071c)
Supplement: d5em01071c1.xlsx [file d5em01071c1.xlsx]

## Sheet: SRT-V4
	NTA Study Reporting Tool
	Please read before using! Purpose: This Tool was developed for use by NTA researchers and reviewers to assess the quality of NTA study reporting. The resulting scores reflect solely whether the reporting is sufficiently complete and transparent (based on current, best available understanding of key study aspects in the environmental, food, exposomics, and metabolomics NTA communities). The Tool i…
	Section	Category	Sub-Category	Example Information to Report	Score (use drop-down menu)	Rationale for score
	Methods	Study Design	Objectives & Scope	• Study goals and hypotheses *** • Scope of the study with respect to use of NTA / suspect screening *** • Expected chemical and/or metabolite coverage of the approach and potential limitations *** (Potential limitations may need to be further devloped but not sure if here or somewehre else)		Described in last paragraph of introduction in main text for objectives, hypotheses, and scope
			Sample Information & Preparation	• Sample collection/replication, handling/storage, preparation, extraction, & clean-up methods (and related QA practices)*** • Intended use of samples (e.g., method development, compound identification, etc.) *** • Development and intended use of blanks ***		Desribed in main text under Methods subheadings "Experimental Design" and "Analytical Methods"
			QC Spikes & Samples	• Development of QC spikes/samples (e.g., isotopically labeled standards/spikes, native standard spikes, matrix pools) ** Matrix pools • Intended use of QC spikes/samples (e.g., to monitor instrument performance, data normalization, evaluate signal response range, etc.) and associated calculations and/or visualizations (e.g., mass error of spiked QC compounds, plot of signal response over time, e…		NA to this paper
		Data Acquisition	Analytical Sequence	• Sample randomization and use of replicate injections (e.g., technical/analytical replicates, field/laboratory/biological replicates)*** • Inclusion of blanks and QC samples in the acquisition sequence ** • Information about single vs. multiple analytical batches**		Describe in Analytical Methods UHPLC-HRMS section and Table S5
			Chromatography	• Note: chromatography is intended to include any online separation technique used prior to mass spectrometric detection. • Instrument specifications • Method settings (e.g., column/guard, mobile phases, gradient, injection techniques)		Describe in Analytical Methods UHPLC-HRMS section and Table S2
			Mass Spectrometry	• Instrument specifications • Instrument calibration and/or tuning procedures • Method settings (e.g., acquisition parameters, such as polarity, resolution, data-dependent vs. data-independent)		Describe in Analytical Methods UHPLC-HRMS section and Tables S3 and S4
		Data Processing & Analysis	Data Processing	• File conversion information (e.g., to open-source format, centroiding) • Software program(s) used • Workflow steps (e.g., peak picking, RT calibration, alignment, gap filling) and settings • Feature detection thresholds (e.g., replicate detection criteria; min height, area, or S/N levels; comparison to occurrence/abundance in blanks) • Data correction or normalization methods (e.g., peak area/h…		Described in Data processing and analysis section, Table S6, and Figures S4 and S5
			Statistical & Chemometric Analysis	• Software programs(s)/package(s) used & samples/sample groups to which analyses were applied • Basic statistical analysis method goals (e.g., summarize data, evaluate variability, hypothesis testing, identify outliers), type (e.g., Wilcoxon rank sum test, Chi-square test, dispersion ratio evaluation, Spearman/Pearson evaluation), assumptions, and settings/thresholds • Chemometric analysis method…		Described in Data processing and analysis section
			Annotation & Identification	• Software program(s) used (or description of manual annotation/identification efforts) • Libraries and databases used (including details such as chemical coverage, resolution, metadata inclusion; information about in-house databases) • Workflow steps (e.g., formula assignment, suspect screening, MS/MS spectral interpretation or library matching) • Workflow methods & settings (e.g., formula predi…		Described in Data processing and analysis section
	Results	Data Outputs	Statistical & Chemometric Outputs	• Basic statistical outputs (e.g., adj. p-values, standard deviations, test statistics) • Results of chemometric analyses (e.g., reported classifications/groupings of features or samples, outlier removal, observed trends in the data, metabolomic pathway analysis) • Visuals/plots (e.g., Venn diagrams, heatmaps, clustering dendrograms, volcano plots, box plots, network diagrams, PCA and loading plo…		Described in Data processing and analysis. Shown in Figure 1 (HCA), use of cos(q) metric
			Identification & Confidence Levels	• Reported identifications and associated confidence levels (e.g., levels described by Schymanski et al., ES&T, 2014) • Supporting data for annotation/identification (e.g., formula match scores, fine isotope pattern, retention time match, MS/MS match scores, source of MS/MS spectra) • For features with lower confidence IDs (i.e., not standard-confirmed), proposed tentative structures and other an…		Described in Data processing and analysis (note that the Schamaski framework was not used), Details of compounds in Tables S8-S13
		QA/QC Metrics	Data Acquisition QA/QC	• Quality: Adherence to QA/QC protocols for sample preparation and data acquisition • Boundary: Description of the potential impacts of methods (sample prep, chromatographic, MS) on observable chemical space • Accuracy: Reported chromatographic and mass accuracy • Precision: Variability of observed retention time, precursor mass error, and abundance		Described in data processing and analysis, Anlaytical Methods (UHPLC-HRMS), and reported in Tables S9 and S13
			Data Processing & Analysis QA/QC	• Quality: Outcomes of QC checks or filtering steps along the data processing & analysis workflow • Boundary: Impact of data processing & subsequent analysis method(s) on observed chemical space, observed limits of detection/ID • Accuracy: Performance measures (True Positive Rate, False Positive Rate, etc.) for known compounds or samples with known classification • Precision: Reproducibility/repe…		Referenced throughout the Methods and Results of main text and in SI, not in one specific location.

## Sheet: Plot Multiple Scores
	Note: Do not change the name of this tab! There is a hidden, linked tab that relies on the static name to plot scores.
					FILL IN YOUR REVIEWER SCORES HERE (USE DROP-DOWN MENUS)					SCORES WILL BE PLOTTED HERE
	Section	Category	Sub-Category		Reviewer 1	Reviewer 2	Reviewer 3	Author Review
	Methods	Study Design	Objectives & Scope		3	3	2	3
			Sample Information & Preparation		1	2	3	2
			QC Spikes & Samples
		Data Acquisition	Analytical Sequence
			Chromatography
			Mass Spectrometry
		Data Processing & Analysis	Data Processing
			Statistical & Chemometric Analysis
			Annotation & Identification
	Results	Data Outputs	Statistical & Chemometric Outputs
			Identification & Confidence Levels
		QA/QC Metrics	Data Acquisition QA/QC
			Data Processing & Analysis QA/QC
										NA	0	1	2	3

## Sheet: HIDDEN Plotting
								-1.2	-1	-0.8	-1.4
	Section	Category	Sub-Category	Y	External Avg	External Stdev	Author	Ext NA 1	Ext NA 2	Ext NA 3	Author NA	Ext Min	Ext Max	Err-Min	Err-Max
	Methods	Study Design	Objectives & Scope	17	-4	-4	-4	#REF!	#REF!	#REF!	#REF!
			Sample Information & Preparation	16	-4	-4	-4	#REF!	#REF!	#REF!	#REF!
			QC Spikes & Controls	15	-4	-4	-4	#REF!	#REF!	#REF!	#REF!
		Data Acquisition	Analytical Sequence	13	-4	-4	-4	#REF!	#REF!	#REF!	#REF!
			Chromatography	12	-4	-4	-4	#REF!	#REF!	#REF!	#REF!
			Mass Spectrometry	11	-4	-4	-4	#REF!	#REF!	#REF!	#REF!
		Data Processing & Analysis	Data Processing	9	-4	-4	-4	#REF!	#REF!	#REF!	#REF!
			Statistical & Chemometric Analysis	8	-4	-4	-4	#REF!	#REF!	#REF!	#REF!
			Annotation & Identification	7	-4	-4	-4	#REF!	#REF!	#REF!	#REF!
	Results	Data Outputs	Statistical & Chemometric Outputs	5	-4	-4	-4	#REF!	#REF!	#REF!	#REF!
			Identification & Confidence Levels	4	-4	-4	-4	#REF!	#REF!	#REF!	#REF!
		QA/QC Metrics	Data Acquisition QA/QC	2	-4	-4	-4	#REF!	#REF!	#REF!	#REF!
			Data Processing & Analysis QA/QC	1	-4	-4	-4	#REF!	#REF!	#REF!	#REF!

## Sheet: HIDDEN Scores Dropdowns
	NA
	0
	1
	2
	3

## Sheet: Score Explanation
Score	Description	Example 1 – Analytical Sequence	Example 2 – Statistical & Chemometric Analysis	Example 3 – Data Processing & Analysis QA/QC
0	No elements of relevant reporting are present.	No details are provided regarding analysis order and batch information. Based on reporting, the experiment could not be replicated.	Statistical analyses were performed, but no information was provided about software, methods, assumptions, and thresholds.	No details are provided about the quality, boundary, accuracy, and precision of the data processing and analysis method(s). Based on reporting, the overall performance of the processing and analysis method(s) is unclear.
1	Some elements of relevant reporting are present, but major improvements are needed.	Some details are provided regarding analysis order and batch information, but major details that would assist in the interpretation of the results are lacking (e.g., the authors reported that blanks were analyzed, but no information about frequency/injection or sample order within the acquisition sequence was provided).	Statistical analyses were performed, but gaps in method details limit method reproducibility.	Some details are provided about the quality, boundary, accuracy, and precision of the data processing and analysis method(s), but major gaps limit understanding of overall performance (e.g., impacts of method choices on observed chemical space are discussed, but true/false positive rates, workflow QC checks, and reproducibility of identification are not reported).
2	Most elements of relevant reporting are present, but minor improvements are needed.	The majority of analysis order and batch information is provided, but some details are missing that could assist interpretation of the results (e.g., analysis order was reported, including sample randomization and the frequency/order of external reference standards and method blanks; however, information about multiple analytical batches was unclear).	Statistical analyses were performed, and the majority of method details are provided (e.g., the authors clearly reported the software, methods, and assumptions, but minor details regarding method thresholds are missing that would improve the reader’s ability to interpret the results).	Detailed information is provided about the quality, boundary, accuracy, and precision of the data processing and analysis method(s), but minor details that could improve the reader’s ability to interpret the impact on results are excluded (e.g., the authors do not discuss possible sources of variability in the outcomes of their identification workflow).
3	All elements of relevant reporting are present.	All details regarding sample randomization, replicate injections, the inclusion of blanks and QC samples in the acquisition sequence, and information about analytical batches are provided so that the experiment could be reproduced by an outside researcher.	Statistical analyses were performed, and all method details are reported in sufficient detail to allow a reader to reproduce the method and clearly understand the impact of method choices on the analysis results.	All necessary detailed information about the quality, boundary, accuracy, and precision of the data processing and analysis method(s) are provided and the implications are discussed.
NA	Reporting not relevant to the study.	Analytical sequence and batch information should be reported for all studies; however, it is less critical for studies that do not rely on comparisons of measurement data across samples.	Statistical analyses were not performed (e.g., the study is solely focused on chemical annotation & identification).	Reporting the quality, boundary, accuracy, and precision of the data processing & analysis methods is informative for all studies.
