# Supplementary material
Source: Royal Society of Chemistry journal article supplement (doi:10.1039/d5em01071c)
Supplement: d5em01071c2.pdf [file d5em01071c2.pdf]

## Supporting Information

# Spatial and Temporal Variation of Suspect Screening derived Cyanobacterial Secondary Metabolite Mixtures during Harmful Algal Bloom Events in Shallow Agroecosystem Lakes

Stanley W. Kohls,<sup>ab</sup> Lyndy Holdt,<sup>cd</sup> Nervana Metwali,<sup>c</sup> Corey D. Markfort,<sup>ab</sup> Peter S. Thorne,<sup>c</sup>  
Gregory H. LeFevre<sup>\*ab</sup>

<sup>a</sup>Department of Civil & Environmental Engineering, University of Iowa, 4105 Seamans Center,  
Iowa City, IA 52242, United States; <sup>b</sup>IIHR-Hydroscience & Engineering, 100 C. Maxwell  
Stanley Hydraulics Laboratory, Iowa City, IA 52242, United States; <sup>c</sup>Department of  
Occupational and Environmental Health, The University of Iowa, Iowa City, Iowa 52242, United  
States; <sup>d</sup>Friends of Lakeside Lab, 1838 Highway 86, Milford, IA 51351, United States

\* Corresponding Author: [gregory-lefevre@uiowa.edu](mailto:gregory-lefevre@uiowa.edu); Phone: +319 335 5655, Department of  
Civil and Environmental Engineering, 4105 Seamans Center for Engineering, University of  
Iowa, Iowa City IA, 52242, United States

Total Pages (Including this page): 51  
Total number of Figures: 5  
Total number of Tables: 19

## Supporting Information Table of Contents:

|                                                                                                                                                                                                                                                         |    |
|---------------------------------------------------------------------------------------------------------------------------------------------------------------------------------------------------------------------------------------------------------|----|
| <b>Section S1: Site and Sample Descriptions</b> .....                                                                                                                                                                                                   | 4  |
| <b>Figure S1: Visual Representation of Site Locations</b> .....                                                                                                                                                                                         | 4  |
| <b>Table S1: Site descriptions/sample collection</b> .....                                                                                                                                                                                              | 4  |
| <b>Figure S2: Land use (from the NLCD 2023) for watersheds encompassing Lake Darling and Lake MacBride displayed visually and numerically.</b> .....                                                                                                    | 5  |
| <b>Figure S3: Example of conditions at (A) Lake MacBride and (B) Lake Darling.</b> .....                                                                                                                                                                | 6  |
| <b>Section S2: Analytical Methods and Chemicals</b> .....                                                                                                                                                                                               | 7  |
| <b>S2.1 Sample Collection:</b> .....                                                                                                                                                                                                                    | 7  |
| <b>S2.2 ELISA</b> .....                                                                                                                                                                                                                                 | 7  |
| <b>S2.3 Suspect Screening</b> .....                                                                                                                                                                                                                     | 8  |
| <b>Table S2: Locations of information relevant to the BP4NTA SRT</b> .....                                                                                                                                                                              | 8  |
| <b>Table S3: Chromatography gradient</b> .....                                                                                                                                                                                                          | 9  |
| <b>Table S4: Full Scan MS Acquisition Parameters</b> .....                                                                                                                                                                                              | 10 |
| <b>Table S5: ddMS2 Acquisition Parameters</b> .....                                                                                                                                                                                                     | 11 |
| <b>Table S6: Data Acquisition sequences</b> .....                                                                                                                                                                                                       | 13 |
| <b>Section S3: Data Processing</b> .....                                                                                                                                                                                                                | 14 |
| <b>S3.1 Compound Discoverer</b> .....                                                                                                                                                                                                                   | 14 |
| <b>Figure S4: Workflow Tree in Compound Discover used for the analysis of all datasets.</b> .....                                                                                                                                                       | 14 |
| <b>Table S7: Parameters used for Compound Discover Analysis, applied using the workflow shown in Figure S4.</b> .....                                                                                                                                   | 15 |
| <b>Figure S5: Compound Discover filter set for creation of working feature lists. Features were “checked” when a split peak resulted in duplicate feature entries at different retention times, and the highest-quality peak was not removed.</b> ..... | 19 |
| <b>S3.2 MS2Query</b> .....                                                                                                                                                                                                                              | 19 |
| <b>Section S4: Supplemental Results Figures, Tables, and Statistics</b> .....                                                                                                                                                                           | 20 |
| <b>Table S8: Anatoxin-a and Microcystin concentrations at Lake MacBride site</b> .....                                                                                                                                                                  | 20 |
| <b>Table S12: Tentatively Identified Cyanometabolites from Lake MacBride and their associated information as reported in the CyanMetDB.</b> .....                                                                                                       | 22 |
| <b>Table S13: Tentatively Identified Cyanometabolites from Lake MacBride with critical suspect screening results<sup>†</sup></b> .....                                                                                                                  | 24 |
| <b>Table S14: Lake MacBride Tentatively Identified Compounds with annotated MS2 Spectra and structure for applicable features and identification confidence level in [ ]</b> 26                                                                         |    |
| <b>Table S15: Cosine theta values for the filtered (cyanometDB matched) results from Lake MacBride (based on normalized responses for each feature). The green highlight indicates <math>\cos(\theta) &gt; 0.85</math>.</b> .....                       | 39 |

|                                                                                                                                                                                                                                 |           |
|---------------------------------------------------------------------------------------------------------------------------------------------------------------------------------------------------------------------------------|-----------|
| <b>Table S16: Tentatively Identified Cyanometabolites from Lake Darling and their associated information as reported in the CyanMetDB. ....</b>                                                                                 | <b>40</b> |
| <b>Table S17: Tentatively Identified Cyanometabolites from Lake Darling with critical suspect screening results<sup>†</sup> .....</b>                                                                                           | <b>42</b> |
| <b>Table S18: Lake Darling Tentatively Identified Compounds with annotated MS2 Spectra and structure for applicable features and identification confidence level in []</b>                                                      | <b>43</b> |
| <b>Table S19: Cosine theta values for the filtered (cyanometDB matched) results from Lake Darling (based on normalized responses for each feature). The green highlight indicates <math>\cos(\theta) &gt; 0.85</math>. ....</b> | <b>50</b> |
| <b>References .....</b>                                                                                                                                                                                                         | <b>51</b> |

## Section S1: Site and Sample Descriptions

The two lakes sampled in this study are in Iowa, USA, with the sampling sites' coordinates shown in Table S1. Land use in the watersheds of both lakes is primarily cultivated agricultural and hay/pasture, with detailed land use information shown in Figure S2 and Figure S1, derived from the National Land Cover Database (NLCD). This land-use data was used to inform the classification of these lakes as strongly influenced by agroecosystems. Examples of the conditions of the sampling sites during sampling are shown in Figure S3.

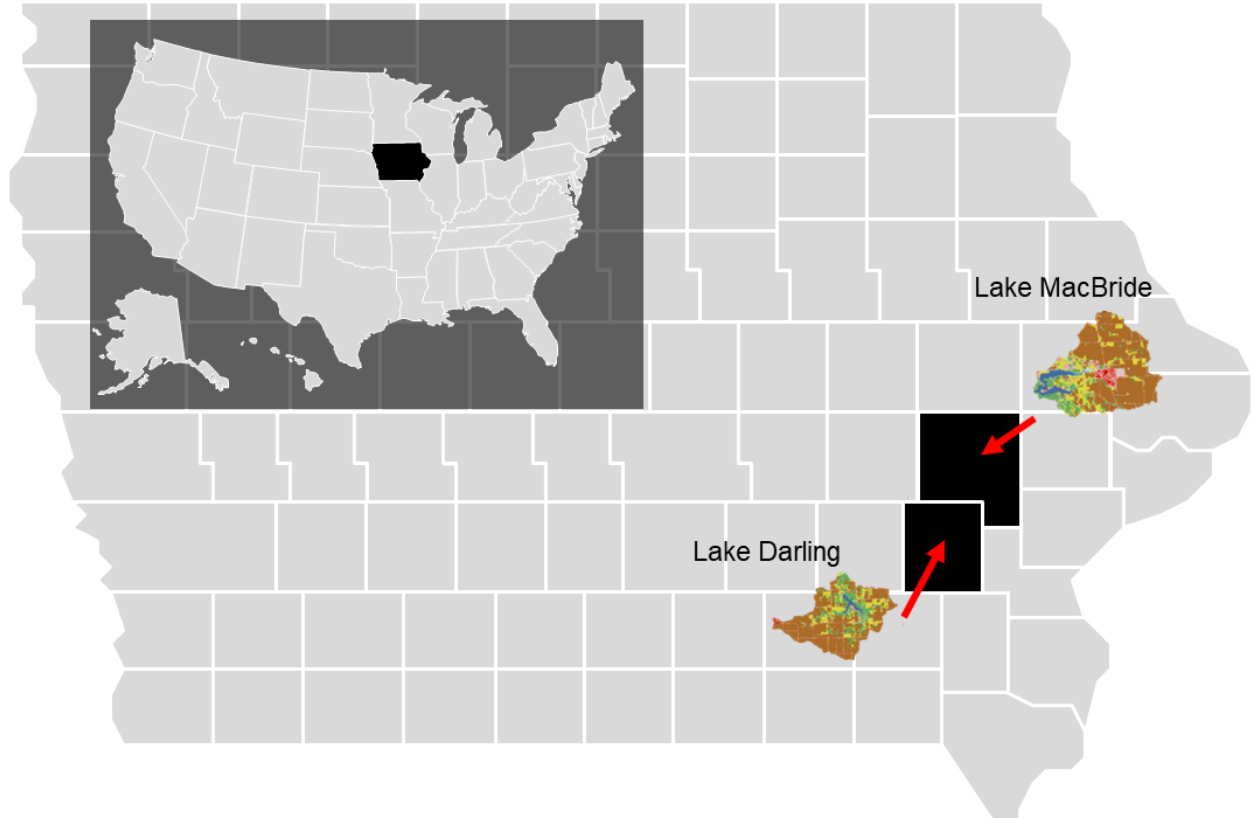

**Figure S1:** Visual Representation of Site Locations

**Table S1:** Site descriptions/sample collection

| Lake MacBride       | Location   |             |
|---------------------|------------|-------------|
|                     | Latitude   | Longitude   |
| North 1             | 41.797796  | -91.563066  |
| North 2             | 41.797742  | -91.564402  |
| South 1             | 41.7916511 | -91.5500512 |
| South 2             | 41.7915541 | -91.5512981 |
| <b>Lake Darling</b> | 41.190278  | -91.8925    |

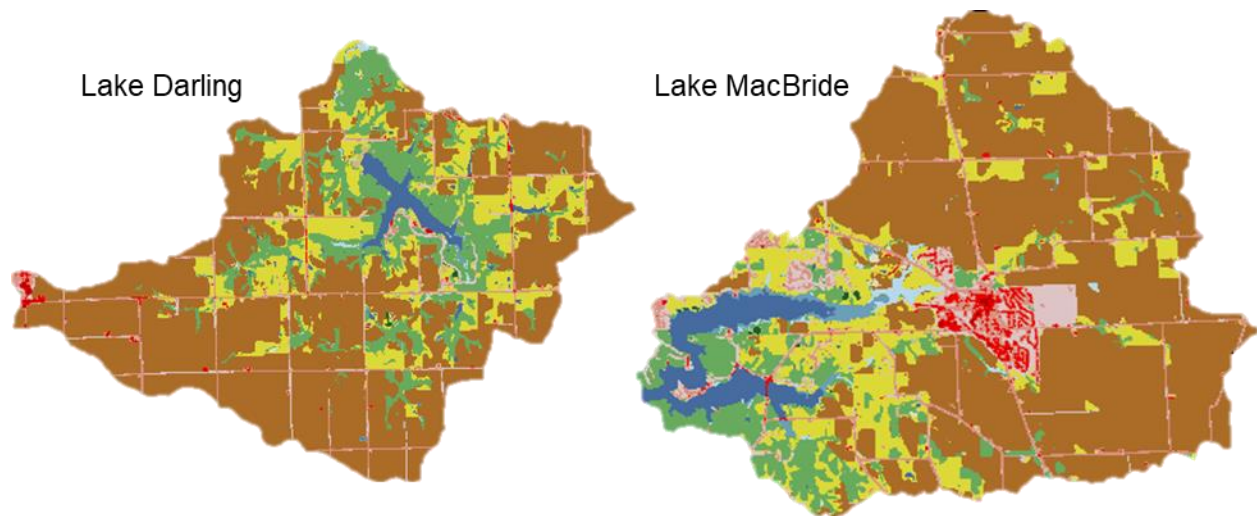

| Watershed                              | Open Water | Developed | Baren Land | Forest | Shrub/Scrub | Herbaceous | Hay/Pasture | Cultivated Crops | Wetland |
|----------------------------------------|------------|-----------|------------|--------|-------------|------------|-------------|------------------|---------|
| Lake MacBride<br>(HUC 12-070802071008) | 4.66%      | 12.86%    | 0.01%      | 9.74%  | 0.05%       | 0.18%      | 14.78%      | 55.77%           | 1.96%   |
| Lake Darling<br>(HUC 12-070801070304)  | 2.51%      | 6.26%     | 0.06%      | 15.71% | 0.24%       | 0.15%      | 15.44%      | 59.08%           | 0.56%   |

**Figure S2:** Land use (from the NLCD 2023) for watersheds encompassing Lake Darling and Lake MacBride displayed visually and numerically.

**A) Lake MacBride**

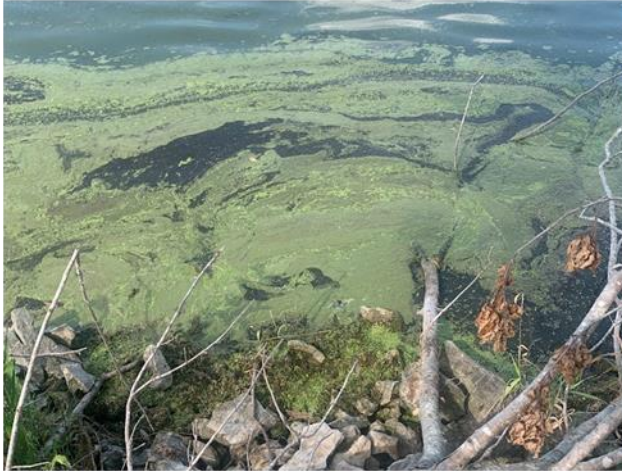

**B) Lake Darling**

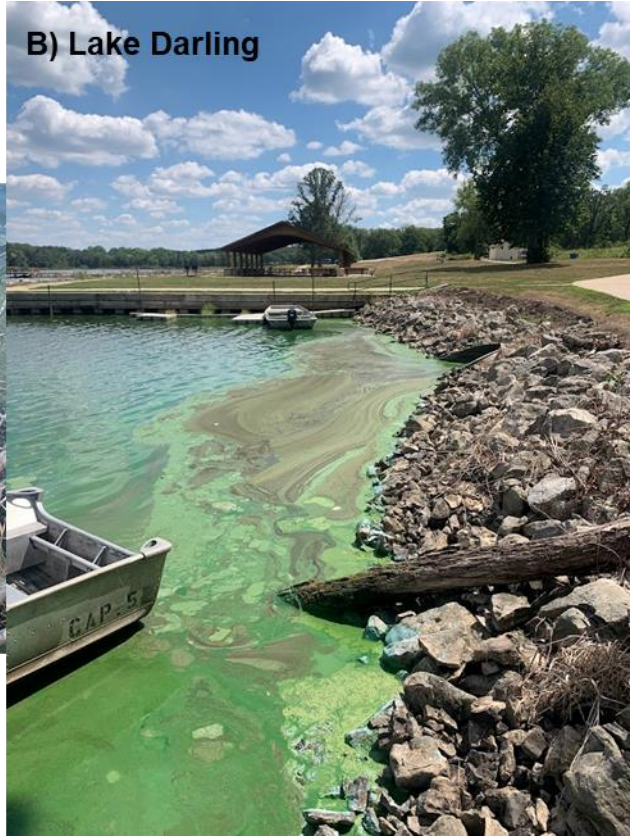

**Figure S3:** Example of conditions at (A) Lake MacBride and (B) Lake Darling.

## Section S2: Analytical Methods and Chemicals

### S2.1 Sample Collection:

The sampling protocol was adapted from the Ohio EPA Method 546, specifically the determination of total MCs in ambient water, and the sample collection methods from the Eurofins Abraxis Microcystins-ADDA Enzyme-Linked Immunosorbent Assay (ELISA) kit.<sup>1</sup> At a beach site, surface water samples were taken at both ends of the designated swimming area and at the center. At each area (left, center, and right), the polyethylene sample dipper was washed in the water three times, to remove surface scum, at approximately 1 meter off the shore before taking about 200 mL of water to pour into a pre-labeled and sterilized 250 mL amber glass jar. Samples were immediately put on ice in a cooler to be transported back to the laboratory, where they were stored in -20°C freezers.

### S2.2 ELISA

Analysis was performed following instructions given by the kit manufacturer, eurofins Abraxis, which can be found online. Kits used were the Microcystins-ADDA ELISA (product no. 520011, Microcystins-ADDA ELISA) the Anatoxin-a Receptor Binding Assay (product no. 520050, Anatoxin-a ELISA), and the Saxitoxin (PSP) ELISA, Microtiter Plate (product no. 52255B, Saxitoxin (PSP) ELISA). The Microcystins-ADDA kit measured total MCs and nodularins (NOD) in a sample, based on detection of a characteristic feature common to microcystin and nodularin congeners (structural variants), specifically, the ADDA (3-amino-9-methoxy-2,6,8-trimethyl-10-phenyldeca-4,6-dienoic acid) amino acid side chain. The kit was calibrated against the specific congener, MC-LR for standardization. The ANTX assay is a direct 60 competitive ELISA based on the recognition of anatoxin-a by a monoclonal antibody, as well as the SXT assay but using more than one specific antibodies. Five standards in duplicate were used, ranging from zero to five parts per billion (ppb, equivalent to  $\mu\text{g/L}$ ). As well as a Quality Control Standard (QCS) within the range of  $0.75 \pm 0.185$  ppb and a Low Calibration Range Check (LCRC) control within the range of  $0.40 \pm 0.16$  ppb. There were no issues with the standards or controls in any assay performed. The resulting microtiter plate was read using a SpectraMax plate reader at a wavelength of 450 nm (Molecular Devices), analyzed using the associated Softmax Pro 5.4 software. Samples below  $0.15 \mu\text{g/L}$  or above  $5 \mu\text{g/L}$  were out of the range of detection of the assay for both the MC and ANTX kit. The lower LOD for the SXT kit was  $0.02 \mu\text{g/L}$ . MC samples above the limit of detection (LOD) were diluted 5- and 10-fold, while ANTX samples were diluted 100-, 1000-, and 10,000-fold to accurately quantify the toxin concentration.

### S2.3 Suspect Screening

Chromatography parameters used for non-target analysis. A Thermo Vanquish Flex UHPLC system was fitted with an Agilent C18 column for peak separation prior to mass spectrometry. Guard column: Agilent Eclipse Plus C18, 2.1×5 mm, 1.8 μm. Analytical column: Agilent Poroshell 120, EC-C18 2.7 μm, 2.1×100 (PN 695775-902(T)). Mass spectrometry was performed in succession with the UHPLC. The HRMS setup was a Thermo Scientific Q Exactive hybrid quadrupole-Orbitrap mass spectrometer. Each sample was injected in duplicate using this polarity-switching full-scan method.

A summary of where information relevant to the BP4NTA (Best Practices for Non-Targeted Analysis; <https://nontargetedanalysis.org/>) SRT (Study Reporting Tool) “scoresheet” is found in Table S2.<sup>22</sup> The full SRT scoring document was shared at the time of review, and the original document and related paper can be found in the references.

**Table S2: Locations of information relevant to the BP4NTA SRT**

| Section | Category                                       | Sub-Category                                           | Rationale for score                                                                                        |
|---------|------------------------------------------------|--------------------------------------------------------|------------------------------------------------------------------------------------------------------------|
| Methods | Study Design                                   | <a href="#">Objectives &amp; Scope</a>                 | Described in the last paragraph of the introduction in the main text for objectives, hypotheses, and scope |
|         |                                                | <a href="#">Sample Information &amp; Preparation</a>   | Described in the main text under the Methods subheadings "Experimental Design" and "Analytical Methods."   |
|         |                                                | <a href="#">QC Spikes &amp; Samples</a>                | NA to this paper                                                                                           |
|         | <a href="#">Data Acquisition</a>               | <a href="#">Analytical Sequence</a>                    | Describe in the Analytical Methods UHPLC-HRMS section and Table S6                                         |
|         |                                                | <a href="#">Chromatography</a>                         | Describe in the Analytical Methods UHPLC-HRMS section and Table S3                                         |
|         |                                                | <a href="#">Mass Spectrometry</a>                      | Describe in the Analytical Methods UHPLC-HRMS section and Tables S4 and S5                                 |
|         | <a href="#">Data Processing &amp; Analysis</a> | <a href="#">Data Processing</a>                        | Described in the Data processing and analysis section, Table S7, and Figures S5 and S6                     |
|         |                                                | <a href="#">Statistical &amp; Chemometric Analysis</a> | Described in the Data processing and analysis section                                                      |
|         |                                                | <a href="#">Annotation &amp; Identification</a>        | Described in the Data processing and analysis section                                                      |

|                |                      |                                               |                                                                                                                                   |
|----------------|----------------------|-----------------------------------------------|-----------------------------------------------------------------------------------------------------------------------------------|
| <u>Results</u> | <u>Data Outputs</u>  | <u>Statistical &amp; Chemometric Outputs</u>  | Described in Data processing and analysis. Shown in Figure 1 (HCA), use of $\cos(\theta)$ metric                                  |
|                |                      | <u>Identification &amp; Confidence Levels</u> | Described in Data processing and analysis (note that the Schamaski framework was not used), Details of compounds in Tables S9-S14 |
|                | <u>QA/QC Metrics</u> | <u>Data Acquisition QA/QC</u>                 | Described in data processing and analysis, Analytical Methods (UHPLC-HRMS), and reported in Tables S10 and S14                    |
|                |                      | <u>Data Processing &amp; Analysis QA/QC</u>   | Referenced throughout the Methods and Results of the main text and in the SI, not in one specific location.                       |

**Table S3:** Chromatography gradient

*A= Water with 0.1% Formic Acid*

*B= Acetonitrile with 0.1% Formic Acid*

| <b>Time Interval</b> | <b>Time (min)</b> | <b>Flow (mL/min)</b> | <b>%B</b> |
|----------------------|-------------------|----------------------|-----------|
| 1                    | 0.00              | 0.40                 | 10.0      |
| 2                    | 4.00              | 0.40                 | 20.0      |
| 3                    | 8.00              | 0.40                 | 40.0      |
| 4                    | 10.00             | 0.40                 | 60.0      |
| 5                    | 15.00             | 0.40                 | 90.0      |
| 6                    | 15.20             | 0.40                 | 10.0      |
| 7                    | 20.00             | 0.40                 | 10.0      |

**Table S4:** Full Scan MS Acquisition Parameters.

Mass spectrometry was performed in succession with the UPLC listed above. The HRMS setup was a Thermo Scientific Q Exactive hybrid quadrupole-Orbitrap mass spectrometer. Each sample was injected in duplicate using this polarity-switching full-scan method.

| <b>Polarity Switching - Full Scan</b> |           |                                                              |              |                       |                 |
|---------------------------------------|-----------|--------------------------------------------------------------|--------------|-----------------------|-----------------|
| <b>Method of Q Exactive</b>           |           | <b>Setup</b>                                                 |              | <b>Experiments</b>    |                 |
| <u>Overall method settings</u>        |           | <u>Tunefiles</u>                                             |              | <u>Full MS – SIM</u>  |                 |
| <b>Global Settings</b>                |           | <b>General</b>                                               |              | <b>General</b>        |                 |
| Use lock masses                       | off       | Switch Count                                                 | 0            | Runtime               | 0 to 15 min     |
| Lock mass injection                   | –         | Base Tunefile<br>C:\Xcalibur\methods\300ul-min_020122.mstune |              | Polarity              | positive        |
| Chrom. peak width (FWHM)              | 3 s       | <b>Contact Closure</b>                                       |              | In-source CID         | 0.0 eV          |
| <b>Time</b>                           |           | <b>General</b>                                               |              | <b>Full MS – SIM</b>  |                 |
| Method duration                       | 20.00 min | Used                                                         | FALSE        | Microscans            | 1               |
| <b>Customized Tolerances (+/-)</b>    |           | Start in Closed                                              | TRUE         | Resolution            | 70,000          |
| Lock Masses                           | –         | Switch Count                                                 | 0            | AGC target            | 1e6             |
| Inclusion                             | 10.00 ppm | <b>Syringe</b>                                               |              | Maximum IT            | 200 ms          |
| Exclusion                             | –         | <b>General</b>                                               |              | Number of scan ranges | 1               |
| Neutral Loss                          | –         | Used                                                         | FALSE        | Scan range            | 100 to 1500 m/z |
| Mass Tags                             | –         | Start in OFF                                                 | TRUE         | Spectrum data type    | Profile         |
| Dynamic Exclusion                     | –         | Stop at end of run                                           | FALSE        | <b>Full MS – SIM</b>  |                 |
|                                       |           | Switch Count                                                 | 0            | <b>General</b>        |                 |
|                                       |           | <b>Pump setup</b>                                            |              | Runtime               | 0 to 15 min     |
|                                       |           | Syringe type                                                 | Hamilton     | Polarity              | negative        |
|                                       |           | Flow rate                                                    | 3.000 µL/min | In-source CID         | 0.0 eV          |
|                                       |           | Inner diameter                                               | 2.303 mm     | <b>Full MS – SIM</b>  |                 |
|                                       |           | Volume                                                       | 250 µL       | Microscans            | 1               |
|                                       |           | <b>Divert Valve A</b>                                        |              | Resolution            | 70,000          |
|                                       |           | <b>General</b>                                               |              | AGC target            | 1e6             |
|                                       |           | Used                                                         | TRUE         | Maximum IT            | 200 ms          |
|                                       |           | Start in 1-2                                                 | TRUE         | Number of scan ranges | 1               |
|                                       |           | Switch Count                                                 | 1            | Scan range            | 100 to 1500 m/z |
|                                       |           | <b>Element 1</b>                                             |              | Spectrum data type    | Profile         |
|                                       |           | At                                                           | 15.00 min    |                       |                 |
|                                       |           | Switches to                                                  | 1-6          |                       |                 |

**Table S5: ddMS2 Acquisition Parameters**

| <b>Positive or Negative ddMS2</b>  |           |                                           |                      |                                                              |              |
|------------------------------------|-----------|-------------------------------------------|----------------------|--------------------------------------------------------------|--------------|
| <b>Method of Q Exactive</b>        |           | <b>Experiment</b>                         |                      | <b>Setup</b>                                                 |              |
| <u>Overall method settings</u>     |           | <u>Full MS / dd-MS<sup>2</sup> (TopN)</u> |                      | <u>Tunefiles</u>                                             |              |
| <b>Global Settings</b>             |           | <b>General</b>                            |                      | <b>General</b>                                               |              |
| Use lock masses                    | off       | Runtime                                   | 0 to 15 min          | Switch Count                                                 | 0            |
| Lock mass injection                | -         | Polarity                                  | positive or negative | Base Tunefile<br>C:\Xcalibur\methods\300ul-min_020122.mstune |              |
| Chrom. peak width (FWHM)           | 3 s       | In-source CID                             | 0.0 eV               | <b>Contact Closure</b>                                       |              |
| <b>Time</b>                        |           | Default charge state                      | 1                    | <b>General</b>                                               |              |
| Method duration                    | 20.00 min | Inclusion                                 | -                    | Used                                                         | FALSE        |
| <b>Customized Tolerances (+/-)</b> |           | Exclusion                                 | -                    | Start in Closed                                              | TRUE         |
| Lock Masses                        | -         | Tags                                      | -                    | Switch Count                                                 | 0            |
| Inclusion                          | 10.00 ppm | <b>Full MS</b>                            |                      | <b>Syringe</b>                                               |              |
| Exclusion                          | -         | Microscans                                | 1                    | <b>General</b>                                               |              |
| Neutral Loss                       | -         | Resolution                                | 70,000               | Used                                                         | FALSE        |
| Mass Tags                          | -         | AGC target                                | 1.00E+06             | Start in OFF                                                 | TRUE         |
| Dynamic Exclusion                  | -         | Maximum IT                                | 200 ms               | Stop at end of run                                           | FALSE        |
|                                    |           | Number of scan ranges                     | 1                    | Switch Count                                                 | 0            |
|                                    |           | Scan range                                | 100 to 1500 m/z      | <b>Pump setup</b>                                            |              |
|                                    |           | Spectrum data type                        | Profile              | Syringe type                                                 | Hamilton     |
|                                    |           | <b>dd-MS<sup>2</sup> / dd-SIM</b>         |                      | Flow rate                                                    | 3.000 µL/min |
|                                    |           | Microscans                                | 1                    | Inner diameter                                               | 2.303 mm     |
|                                    |           | Resolution                                | 17,500               | Volume                                                       | 250 µL       |
|                                    |           | AGC target                                | 1.00E+05             | <b>Divert Valve A</b>                                        |              |
|                                    |           | Maximum IT                                | 50 ms                | <b>General</b>                                               |              |
|                                    |           | Loop count                                | 3                    | Used                                                         | TRUE         |
|                                    |           | MSX count                                 | 1                    | Start in 1-2                                                 | TRUE         |
|                                    |           | TopN                                      | 3                    | Switch Count                                                 | 1            |
|                                    |           | Isolation window                          | 1.0 m/z              | <b>Element 1</b>                                             |              |
|                                    |           | Isolation offset                          | 0.0 m/z              | At                                                           | 15.00 min    |
|                                    |           | Scan range                                | 200 to 2000          | Switches                                                     | 1-6          |

|                           | m/z                | to |
|---------------------------|--------------------|----|
| Fixed first mass          | -                  |    |
| (N)CE / stepped<br>(N)CE  | nce: 20,<br>40, 60 |    |
| Spectrum data type        | Centroid           |    |
| <b>dd Settings</b>        |                    |    |
| Minimum AGC target        | 4.00E+03           |    |
| Intensity threshold       | 8.00E+04           |    |
| Apex trigger              | -                  |    |
| Charge exclusion          | -                  |    |
| Multiple charge<br>states | all                |    |
| Peptide match             | -                  |    |
| Exclude isotopes          | on                 |    |
| Dynamic exclusion         | 3.0s               |    |
| If idle ..                | pick others        |    |

**Table S6: Data Acquisition sequences**

| Lake Darling Acquisition Sequence |                  | Lake MacBride Acquisition Sequence |                                 |
|-----------------------------------|------------------|------------------------------------|---------------------------------|
| 1                                 | Blank            | 1                                  | Blank                           |
| 2                                 | LD1122_full_1    | 2                                  | HAB_MAC_081722_1_PM_full_1      |
| 3                                 | LD1122_full_2    | 3                                  | HAB_MAC_081722_1_PM_full_2      |
| 4                                 | LD1122_ddms2_neg | 4                                  | HAB_MAC_081722_1_PM_ddms2_neg   |
| 5                                 | LD1122_ddms2_pos | 5                                  | HAB_MAC_081722_1_PM_ddms2_pos   |
| 6                                 | LD1220_full_1    | 6                                  | HAB_MAC_081722_2_PM_full_1      |
| 7                                 | LD1220_full_2    | 7                                  | HAB_MAC_081722_2_PM_full_2      |
| 8                                 | LD1220_ddms2_neg | 8                                  | HAB_MAC_081722_2_PM_ddms2_neg   |
| 9                                 | LD1220_ddms2_pos | 9                                  | HAB_MAC_081722_2_PM_ddms2_pos   |
| 10                                | LD1400_full_1    | 10                                 | HAB_MAC_081722_AP4_PM_full_1    |
| 11                                | LD1400_full_2    | 11                                 | HAB_MAC_081722_AP4_PM_full_2    |
| 12                                | LD1400_ddms2_neg | 12                                 | HAB_MAC_081722_AP4_PM_ddms2_neg |
| 13                                | LD1400_ddms2_pos | 13                                 | HAB_MAC_081722_AP4_PM_ddms2_pos |
| 14                                | Blank2           | 14                                 | HAB_MAC_081722_AP5_PM_full_1    |
| 15                                | LD1415_full_1    | 15                                 | HAB_MAC_081722_AP5_PM_full_2    |
| 16                                | LD1415_full_2    | 16                                 | HAB_MAC_081722_AP5_PM_ddms2_neg |
| 17                                | LD1415_ddms2_neg | 17                                 | HAB_MAC_081722_AP5_PM_ddms2_pos |
| 18                                | LD1415_ddms2_pos | 18                                 | ACN2                            |
| 19                                | LD1430_full_1    |                                    |                                 |
| 20                                | LD1430_full_2    |                                    |                                 |
| 21                                | LD1430_ddms2_neg |                                    |                                 |
| 22                                | LD1430_ddms2_pos |                                    |                                 |
| 23                                | LD1445_full_1    |                                    |                                 |
| 24                                | LD1445_full_2    |                                    |                                 |
| 25                                | LD1445_ddms2_neg |                                    |                                 |
| 26                                | LD1445_ddms2_pos |                                    |                                 |
| 27                                | LD1500_full_1    |                                    |                                 |
| 28                                | LD1500_full_2    |                                    |                                 |
| 29                                | LD1500_ddms2_neg |                                    |                                 |
| 30                                | LD1500_ddms2_pos |                                    |                                 |
| 31                                | Pooled_full_1    |                                    |                                 |
| 32                                | Pooled_full_2    |                                    |                                 |
| 33                                | Pooled_ddms2_neg |                                    |                                 |
| 34                                | Pooled_ddms2_pos |                                    |                                 |
| 35                                | Blank3           |                                    |                                 |

## Section S3: Data Processing

### S3.1 Compound Discoverer

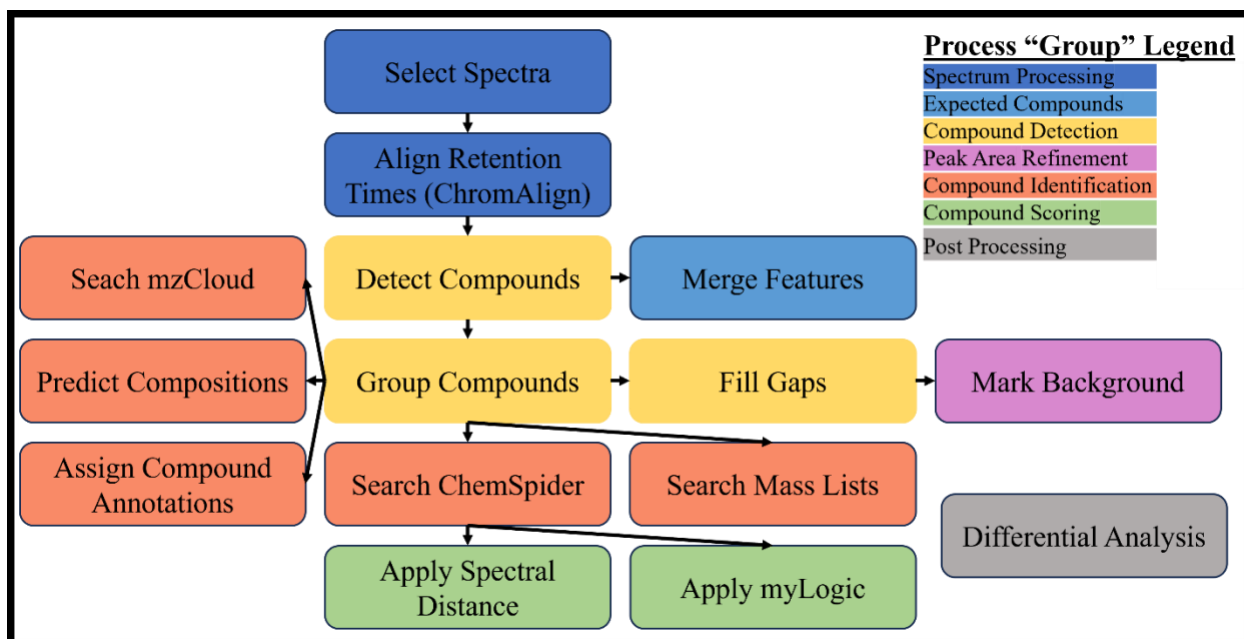

**Figure S4:** Workflow Tree in Compound Discoverer used for the analysis of all datasets. The workflow tree is adapted from the preset workflow “*Environmental w Stats Unknown ID w Online and Local Database Searches*”. The two datasets were processed individually, with one for Lake Darling and Lake MacBride, respectively.

**Table S7:** Parameters used for Compound Discover Analysis, applied using the workflow shown in **Figure S4**.

| Select Spectra                       |                                              |
|--------------------------------------|----------------------------------------------|
| <b>1. Spectrum Properties Filter</b> |                                              |
| Lower RT Limit                       | 0                                            |
| Upper RT Limit                       | 15.0                                         |
| <b>2. Scan Event Filters</b>         |                                              |
| Polarity Mode                        | Any                                          |
| Align Retention Times (ChromAlign)   |                                              |
| <b>1. General Settings</b>           |                                              |
| Reference File                       | First sample in list                         |
| Detect Compounds                     |                                              |
| <b>1. General Settings</b>           |                                              |
| Mass Tolerance [ppm]                 | 5 ppm                                        |
| Min. Peak Intensity                  | 100000                                       |
| Use Most Intense Isotope Only        | True                                         |
| <b>3. Peak Detection</b>             |                                              |
| Chromatographic S/N Threshold        | 1.5                                          |
| Remove Baseline                      | False                                        |
| <b>4. Isotope Pattern Detection</b>  |                                              |
| Group Isotopes for                   | Br; Cl                                       |
| Ions                                 | 33/33 Checked                                |
| Merge Features                       |                                              |
| <b>1. Peak Consolidation</b>         |                                              |
| Mass Tolerance                       | 5 ppm                                        |
| RT Tolerance [min]                   | 0.1                                          |
| Group Compounds                      |                                              |
| <b>1. General Settings</b>           |                                              |
| Mass Tolerance                       | 5 ppm                                        |
| RT Tolerance [min]                   | 0.1                                          |
| Minimum Valley %                     | 10                                           |
| Align Peaks                          | False                                        |
| Preferred Ions                       | [M+H] <sup>+</sup> +1; [M-H] <sup>-</sup> -1 |
| Area Integration                     | Most Common Ion                              |
| <b>2. Peak Rating Contributions</b>  |                                              |
| Area Contribution                    | 3                                            |
| CV Contribution                      | 10                                           |
| FWHM to Base Contribution            | 5                                            |
| Jaggedness Contribution              | 5                                            |
| Modality Contribution                | 5                                            |
| Zig-Zag Index Contribution           | 5                                            |
| <b>3. Peak Rating Filter</b>         |                                              |

|                                  |                                    |
|----------------------------------|------------------------------------|
| Peak Rating Threshold            | 4.5                                |
| Number of Files                  | 3                                  |
| <b>Fill Gaps</b>                 |                                    |
| <b>1. General Settings</b>       |                                    |
| Mass Tolerance                   | 5 ppm                              |
| S/N Threshold                    | 1.5                                |
| <b>Mark Background Compounds</b> |                                    |
| <b>1. General Settings</b>       |                                    |
| Max. Sample/Blank                | 5                                  |
| Max. Blank/Sample                | 0                                  |
| Hide Background                  | True                               |
| <b>Search mzCloud</b>            |                                    |
| <b>1. General Settings</b>       |                                    |
| Compound Classes                 | All                                |
| Library                          | Autoprocessed; Reference           |
| Search MSn Tree                  | False                              |
| <b>2. DDA Search</b>             |                                    |
| Identity Search                  | HighChem HighRes                   |
| Match Activation Type            | True                               |
| Match Activation Energy          | Match with Tolerance               |
| Activation Energy Tolerance      | 20                                 |
| Apply Intensity Threshold        | True                               |
| Similarity Search                | None                               |
| Match Factor Threshold           | 50                                 |
| <b>3. DIA Search</b>             |                                    |
| Use DIA Scans for Search         | True                               |
| Max. Isolation Width [Da]        | 500                                |
| Match Activation Type            | False                              |
| Match Activation Energy          | Any                                |
| Activation Energy Tolerance      | 100                                |
| Apply Intensity Threshold        | True                               |
| Match Factor Threshold           | 20                                 |
| <b>Predict Compositions</b>      |                                    |
| <b>1. Prediction Settings</b>    |                                    |
| Mass Tolerance                   | 5 ppm                              |
| Min. Element Counts              | C H                                |
| Max. Element Counts              | C90 H190 Br3 Cl8 F18 N10 O18 P3 S5 |
| Min. RDBE                        | 0                                  |
| Max. RDBE                        | 40                                 |
| Min. H/C                         | 0.1                                |
| Max. H/C                         | 3.5                                |
| Max. # Candidates                | 10                                 |
| <b>2. Pattern Matching</b>       |                                    |

|                                                              |                                                                                                                                                                                  |
|--------------------------------------------------------------|----------------------------------------------------------------------------------------------------------------------------------------------------------------------------------|
| Intensity Tolerance [%]                                      | 30                                                                                                                                                                               |
| Intensity Threshold [%]                                      | 0.1                                                                                                                                                                              |
| S/N Threshold                                                | 3                                                                                                                                                                                |
| Use Dynamic Recalibration                                    | True                                                                                                                                                                             |
| <b>3. Fragments Matching</b>                                 |                                                                                                                                                                                  |
| Use Fragments Matching                                       | True                                                                                                                                                                             |
| Mass Tolerance                                               | 5 ppm                                                                                                                                                                            |
| S/N Threshold                                                | 3                                                                                                                                                                                |
| <b>Assign Compound Annotations</b>                           |                                                                                                                                                                                  |
| <b>1. General Settings</b>                                   |                                                                                                                                                                                  |
| Mass Tolerance                                               | 5 ppm                                                                                                                                                                            |
| <b>2. Data Sources</b>                                       |                                                                                                                                                                                  |
| Data Source #1                                               | MassList Search                                                                                                                                                                  |
| Data Source #2                                               | Predicted Compositions                                                                                                                                                           |
| Data Source #3                                               | mzCloud Search                                                                                                                                                                   |
| Data Source #4                                               | mzVault Search                                                                                                                                                                   |
| Data Source #5                                               | ChemSpider Search                                                                                                                                                                |
| <b>3. Scoring Rules</b>                                      |                                                                                                                                                                                  |
| Use mzLogic                                                  | True                                                                                                                                                                             |
| Use Spectral Distance                                        | True                                                                                                                                                                             |
| SFit Threshold                                               | 20                                                                                                                                                                               |
| SFit Range                                                   | 20                                                                                                                                                                               |
| <b>4. Reprocessing</b>                                       |                                                                                                                                                                                  |
| Clear Names                                                  | False                                                                                                                                                                            |
| <b>Search ChemSpider</b>                                     |                                                                                                                                                                                  |
| <b>1. Search Settings</b>                                    |                                                                                                                                                                                  |
| Database(s)                                                  | ACToR: Aggregated Computational Toxicology Resource; DrugBank; EAWAG Biocatalysis/Biodegradation Database; EPA DSSTox; EPA Toxcast; FDA UNII – NLM: Toxin, Toxin-Target Database |
| Search Mode                                                  | By Formula or Mass                                                                                                                                                               |
| Mass Tolerance                                               | 5 ppm                                                                                                                                                                            |
| Max. # of results per compound                               | 20                                                                                                                                                                               |
| Max. # of Predicted Compositions to be searched per Compound | 3                                                                                                                                                                                |
| <b>Search Mass Lists</b>                                     |                                                                                                                                                                                  |
| <b>1. Search Settings</b>                                    |                                                                                                                                                                                  |
| Mass Lists                                                   | CyanoMetDD_V3                                                                                                                                                                    |
| Use Retention Time                                           | False                                                                                                                                                                            |
| RT Tolerance [min]                                           | 0.5                                                                                                                                                                              |
| Mass Tolerance                                               | 5 ppm                                                                                                                                                                            |
| <b>Apply mzLogic</b>                                         |                                                                                                                                                                                  |

|                                                            |       |
|------------------------------------------------------------|-------|
| <b>1. Search Settings</b>                                  |       |
| Max. # Compounds                                           | 0     |
| Max. # mzCloud Similarity Results to consider per Compound | 10    |
| Match Factor Threshold                                     | 30    |
| <b>Apply Spectral Distance</b>                             |       |
| <b>1. Pattern Matching</b>                                 |       |
| Mass Tolerance                                             | 5 ppm |
| Intensity Tolerance [%]                                    | 30    |
| Intensity Threshold [%]                                    | 0.1   |
| S/N Threshold                                              | 3     |
| Use Dynamic Recalibration                                  | True  |
| <b>Differential Analysis</b>                               |       |
| <b>1. General Settings</b>                                 |       |
| Log10 Transform Values                                     | True  |
| <b>2. Peak Rating Contributions</b>                        |       |
| Update Peak Rating                                         | False |
| Area Contribution                                          | 3     |
| CV Contribution                                            | 10    |
| FWHM to Base Contribution                                  | 5     |
| Jaggedness Contribution                                    | 5     |
| Modality Contribution                                      | 5     |
| Zig-Zag Index                                              | 5     |

**Figure S5:** Compound Discover filter set for creation of working feature lists. Features were “checked” when a split peak resulted in duplicate feature entries at different retention times, and the highest-quality peak was not removed.

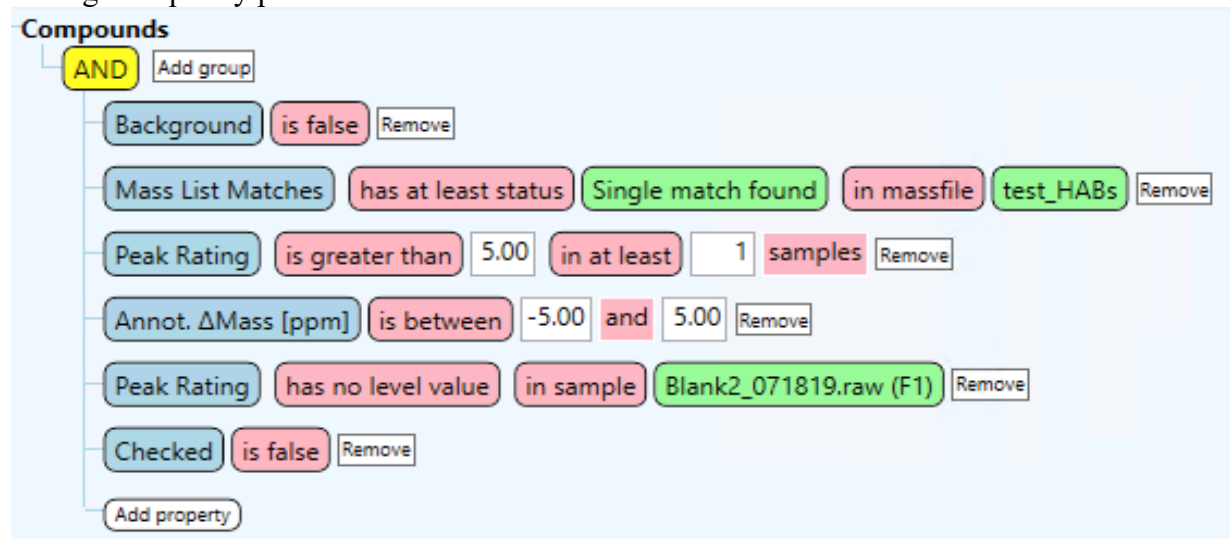

### S3.2 MS2Query

As a secondary library-search method, the MS2Query<sup>3</sup> tool was used to cross-check our MS2 spectra against a spectral library outside mzCloud. From the final filtered data lists, raw spectral data (m/z, intensity pairs) were exported, along with the relevant metadata (RT, Precursor m/z, charge, and ion mode). Using the code from the GitHub repository of the initial MS2query publication, the data were processed with the original GNPS spectral database<sup>4</sup> as the basis for spectral matching. In interpreting the output from MS2query, a prediction score (0-1) > 0.9 and a minimal precursor m/z difference indicate that the proposed ID is a likely candidate when compared to the provided MS2 spectra. While the GNPS database does not have spectra for several of the compounds we initially identified from our results, it does have spectra for some of the more “important” compounds, such as certain Microcystins and Anabaenopeptins. While this tool may assign different IDs to some of our proposed CSMs, this could be due to similar MS2 spectra, the absence of the expected compound in the database, or an incorrect initial tentative ID. However, because this tool was used as a secondary verification against spectral libraries, its results were not used to change IDs; instead, correlated results were treated as elevating the confidence of our initial identifications.

## Section S4: Supplemental Results Figures, Tables, and Statistics

**Table S8:** Anatoxin-a and Microcystin concentrations at Lake MacBride site

| Sample ID             | Sample Name | Anatoxin-a Results (ppb) | Microcystin Results (ppb) |
|-----------------------|-------------|--------------------------|---------------------------|
| HAB-MAC-081722-1-PM   | North 1     | 0.049                    | 2.19                      |
| HAB-MAC-081722-2-PM   | North 2     | 0.044                    | 2.035                     |
| HAB-MAC-081722-AP4-PM | South 2     | 9.532                    | 36.864                    |
| HAB-MAC-081722-AP5-PM | South 1     | 0.431                    | 0.646                     |

**Table S9: Summary of Feature Identification Confidence for each site, based on the Schymanski scale**

| ID Confidence | ID Confidence Meaning (as applied to this study)                 | Lake MacBride | Lake Darling |
|---------------|------------------------------------------------------------------|---------------|--------------|
| Level 1       | Matched with a reference standard (Not applicable to this study) | NA            | NA           |
| Level 2(a)    | Spectral Library Match                                           | 0             | 0            |
| Level 2(b)    | Best fit compound match with MS2Query                            | 2             | 1            |
| Level 3(a)    | Theoretical MS2 Match with good <i>in silico</i> match           | 8             | 2            |
| Level 3(b)    | MS2 present, but poor <i>in silico</i> match or low quality MS2  | 11            | 8            |
| Level 4       | Molecular Formula and Mass List Match with CyanoMetDB only       | 9             | 8            |
| Level 5       | Features Unmatched by the CyanoMetDB                             | 990           | 1141         |

**Table S10: MS2Query results for positive mode spectra**

| query spectrum expected ID                                      | ms2query model prediction score | precursor m/z difference | precursor m/z query spectrum | precursor m/z analog | inchikey        | analog compound name                                                                                     |
|-----------------------------------------------------------------|---------------------------------|--------------------------|------------------------------|----------------------|-----------------|----------------------------------------------------------------------------------------------------------|
| MC-RR (LMB)                                                     | 0.9479                          | 0.0003                   | 519.7903                     | 519.79               | JIGDOBKZMULDHS  | Microcystin RR                                                                                           |
| MC-RR (LD)                                                      | 0.942                           | 0.0008                   | 519.7892                     | 519.79               | JIGDOBKZMULDHS  | Microcystin RR                                                                                           |
| Santacruzamate A (LD)                                           | 0.9305                          | 0.0003                   | 279.1588                     | 279.1591             | DOIRQSBPFJWKBE  | Di-n-butyl phthalate                                                                                     |
| Koshikalide (LMB)                                               | 0.9239                          | 0.0004                   | 295.2264                     | 295.226              | LUZSWWYKCLTDHU  | 9-Oxo-10E,12Z-octadecadienoic acid                                                                       |
| Palythene (LD)                                                  | 0.915                           | 0.0001                   | 268.1039                     | 268.104              | OIRDYFTABQOQ    | ADENOSINE                                                                                                |
| 35-O-β-6 amino-6-deoxyglucopyranosyl-bacteriohopanetetrol (LMB) | 0.9095                          | 0.0004                   | 708.5396                     | 708.54               | AGAUYSZNDYQXOM  | Bacteriohopanetetrol cyclitol ether                                                                      |
| 4-Oxo-beta-apo-13-Carotenone (LMB)                              | 0.6649                          | 91.9746                  | 273.1843                     | 365.1589             | JSKXQKKSUOVSKS  | 7,8-Dihydroxy calonectrin                                                                                |
| Palmyrolinone (LD)                                              | 0.5869                          | 0.0005                   | 238.1069                     | 238.1074             | GOVWOKSKFSBNGD  | Ethopabate                                                                                               |
| Palythine (LMB)                                                 | 0.586                           | 0.0008                   | 245.0992                     | 245.1                | YBJHBAHKTGYVGT  | biotin                                                                                                   |
| Palmyrolinone (LMB)                                             | 0.4912                          | 195.0137                 | 238.1073                     | 433.121              | SUHJYAOFCJYHR   | (2S)-N-(2,4-difluorophenyl)-1-(4,5-dimethoxy-3-oxo-1H-2-benzofuran-1-yl)-5-oxopyrrolidine-2-carboxamide" |
| Radisoumin B (LMB)                                              | 0.4677                          | 17.0157                  | 445.2436                     | 428.2279             | AABILZKQMKVFKHP | Lasiocarpine N-oxide                                                                                     |
| Tricholactone (LD)                                              | 0.3669                          | 129.1157                 | 255.1587                     | 384.2745             | XPDBYTRMUWQPTF  | SCHEMBL21808143                                                                                          |
| cis-Carboxydihydroanatoxin-a (LMB)                              | 0.3188                          | 216.1226                 | 212.1644                     | 428.287              | STIBDTVUVQTFGW  | p(EH-co-MeOx9+CH3)H+2n                                                                                   |

**Table S11: MS2Query results for negative mode spectra**

| query spectrum expected ID                   | ms2query model prediction score | precursor mz difference | precursor mz query spectrum | precursor mz analog | inchikey        | analog compound name                                                                                                                                                                          |
|----------------------------------------------|---------------------------------|-------------------------|-----------------------------|---------------------|-----------------|-----------------------------------------------------------------------------------------------------------------------------------------------------------------------------------------------|
| Anabaenopeptin A (LMB)                       | 0.9585                          | 0.0002                  | 842.4096                    | 842.4094            | JWVKNHDSRADEFFA | Anabaenopeptin A                                                                                                                                                                              |
| [D-Asp3]MC-HiR (LMB)                         | 0.9585                          | 0.0006                  | 993.5421                    | 993.5415            | ZYZCGGRZINLQBL  | MCLR                                                                                                                                                                                          |
| Koshikalide (LD)                             | 0.9569                          | 0.0002                  | 293.1758                    | 293.176             | NLDDIKRKFWEWBK  | 6-Gingerol CollisionEnergy:205060                                                                                                                                                             |
| Malyngic acid (LMB)                          | 0.9569                          | 0.0004                  | 327.2176                    | 327.218             | MKYUCBXUUSZMQB  | (10E,15E)-9,12,13-trihydroxyoctadeca-10,15-dienoic acid                                                                                                                                       |
| 15,16-dihydrosacrolide A (LMB)               | 0.6195                          | 0                       | 309.2071                    | 309.2071            | UYQGVDXDXBAABN  | 13-HpOTfE                                                                                                                                                                                     |
| Sacrolide A (LMB)                            | 0.6181                          | 0                       | 307.1915                    | 307.1915            | BYWWNDLILWPPJP  | albocycline                                                                                                                                                                                   |
| 7-methoxy-9-methylhexadecadienoic acid (LD)  | 0.557                           | 0.0004                  | 295.2275                    | 295.2279            | FBUKMFOXMZGRB   | 9,10-EODE                                                                                                                                                                                     |
| Gloeolactone (LD)                            | 0.5371                          | 510.2232                | 291.1965                    | 801.4197            | WCHBFWOFQZHMK   | Ziyuglycoside I                                                                                                                                                                               |
| Malyngic acid (LD)                           | 0.5113                          | 0.0008                  | 327.2176                    | 327.2168            | NIOKCFABUMZUDL  | FA 18:2+3O                                                                                                                                                                                    |
| 15,16-dihydrosacrolide A (LD)                | 0.4345                          | 462.2595                | 309.2069                    | 771.4664            | YPZYGXBGHDBBH   | Salinomycin, Sodium                                                                                                                                                                           |
| Deoxygadusol (LMB)                           | 0.4345                          | 70.1146                 | 187.0612                    | 257.1758            | MBGYSHXGENGTPB  | Mono(2-ethylhexyl) adipate                                                                                                                                                                    |
| Gloeolactone (LMB)                           | 0.4345                          | 170.0061                | 291.1967                    | 461.2028            | FSTIKTPQGMHLFJ  | Urceolide                                                                                                                                                                                     |
| Puna'auic acid (LMB)                         | 0.4345                          | 272.0697                | 311.1865                    | 583.2562            | BPYKTIZUTYGOLE  | Bilinbin                                                                                                                                                                                      |
| Puna'auic acid (LD)                          | 0.3854                          | 276.3183                | 311.1862                    | 587.5045            | QETRZBRSOYIFDZ  | FAHFA 38:3                                                                                                                                                                                    |
| 12-hydroxy-2-oxo-11-epi-hinesol (LMB)        | 0.316                           | 312.3392                | 251.1653                    | 563.5045            | PGKKGQMNNEIHV   | FAHFA 36:1                                                                                                                                                                                    |
| 478-Da MAA (LD)                              | 0.2872                          | 43.1558                 | 477.1722                    | 520.328             | MHOZNC AVRHAOKT | Glu-CDA                                                                                                                                                                                       |
| 7-methoxy-9-methylhexadecadienoic acid (LMB) | 0.2872                          | 307.138                 | 295.2278                    | 602.3658            | CBEIHVVVTGRGDR  | CHEBI:181256                                                                                                                                                                                  |
| Hapalindole A-formamide (LMB)                | 0.2872                          | 402.266                 | 355.1581                    | 757.4241            | PGRWPWIGJLNDHN  | 2-[[2-[2-[2-[2-[2-(2-(2-hydroxypropanoylamino)-3-methylbutanoyloxy-3-methylbutanoylamino]-3-methylbutanoyloxypropanoylamino]-3-methylbutanoyloxy-3-methylbutanoylamino]-3-methylbutanoic acid |
| Sacrolide A (LD)                             | 0.2872                          | 108.074                 | 306.9188                    | 414.9928            | YURRUMFCDTGTRW  | 2-(benzoylamino)ethyl 5-(aminosulfonyl)-2,4-dichlorobenzoate                                                                                                                                  |

**Table S12:** Tentatively Identified Cyanometabolites from Lake MacBride and their associated information as reported in the CyanMetDB.

| Identified Features                                       | CyanoMet_ID      | Compound Class           | Alternative Class name | Genus initially reported in                                         | Species initially reported in                            | Original ID Location    |
|-----------------------------------------------------------|------------------|--------------------------|------------------------|---------------------------------------------------------------------|----------------------------------------------------------|-------------------------|
| 12-hydroxy-2-oxo-11-epi-hinesol                           | CyanoMetDB_2 209 | other linear non-peptide | Spirovetivane          | <i>Calothrix</i>                                                    |                                                          | Hawaii (freshwater)     |
| 15,16-dihydrosacrolide A                                  | CyanoMetDB_1 632 | other cyclic non-peptide |                        | <i>Aphanothece</i>                                                  | <i>sacrum</i>                                            | Japan (freshwater)      |
| 35-O-β-6 amino-6-deoxyglucopyranosyl-bacteriohopanetetrol | CyanoMetDB_0 823 | other linear non-peptide | Triterpenoid           | <i>Synechocystis</i>                                                | sp.                                                      | Europe (Lab Culture)    |
| 4-Oxo-beta-apo-13-Carotenone                              | CyanoMetDB_2 222 | other linear non-peptide |                        | <i>Anabaena</i>                                                     | <i>cylindrica</i>                                        | UK (freshwater)         |
| 7-methoxy-9-methylhexadecadienoic acid                    | CyanoMetDB_1 629 | other linear non-peptide |                        | <i>Lyngbya</i>                                                      | <i>aestuarii</i>                                         | Hawaii (marine)         |
| [D-Asp <sup>3</sup> ]MC-HiR                               | CyanoMetDB_1 821 | Microcystin              |                        | <i>Planktothrix</i> ;<br><i>Dolichospermum</i> /<br><i>Anabaena</i> | <i>[Planktothrix]sp.</i> ;<br><i>[Dolichospermum]sp.</i> | Germany (freshwater))   |
| Aeruginosin 205A                                          | CyanoMetDB_1 122 | Aeruginosin              |                        | <i>Oscillatoria</i> /<br><i>Planktothrix</i>                        | <i>agardhii</i>                                          | Japan (lab culture)     |
| Aeruginosin 850                                           | CyanoMetDB_0 827 | Aeruginosin              | Depsipeptide           | NA                                                                  |                                                          | Japan (marine)          |
| Anabaenopeptin 871                                        | CyanoMetDB_0 668 | Anabaenopeptin           |                        | <i>Nostoc</i>                                                       | <i>n.a.</i>                                              | Brazil (Freshwater)     |
| Anabaenopeptin A                                          | CyanoMetDB_0 760 | Anabaenopeptin           |                        | <i>Anabaena</i> /<br><i>Dolichospermum</i>                          | <i>flos aquae</i>                                        | Ohio, USA (Lab Culture) |
| Anabaenopeptin B                                          | CyanoMetDB_0 867 | Anabaenopeptin           |                        | <i>Anabaena</i> /<br><i>Dolichospermum</i>                          | <i>flos aquae</i>                                        | Japan (lab culture)     |
| Caldorin                                                  | CyanoMetDB_1 600 | other linear non-peptide |                        | <i>Caldora</i>                                                      | <i>penicillata</i>                                       | Japan (marine)          |
| cis-Carboxydihydroanatoxin-a                              | CyanoMetDB_2 550 | Anatoxin-a               |                        | <i>Oscillatoria</i>                                                 | <i>n.a.</i>                                              | France (Freshwater)     |
| Dehydroradiosumin                                         | CyanoMetDB_1 509 | other linear peptide     |                        | <i>Anabaena</i>                                                     | <i>cylindrica</i>                                        | Japan (lab Culture)     |
| Deoxygadusol                                              | CyanoMetDB_0     | other linear non-peptide | Mycosporine-           | <i>n.a.</i>                                                         |                                                          | Himalayan Lake          |

|                             |                     |                          |                                  |                                            |                                 |                                            |
|-----------------------------|---------------------|--------------------------|----------------------------------|--------------------------------------------|---------------------------------|--------------------------------------------|
|                             | 296                 |                          | like amino acids                 |                                            |                                 | (Freshwater)                               |
| Radiosumin B                | CyanoMetDB_2<br>866 | other linear non-peptide |                                  | Dolichospermum <sup>†</sup>                | planctonicum                    | Finland<br>(freshwater)                    |
| Gloeolactone                | CyanoMetDB_1<br>638 | other linear non-peptide |                                  | <i>Gloeotrichia</i>                        |                                 | Montana, USA<br>(freshwater)               |
| Hapalindole A-<br>formamide | CyanoMetDB_2<br>299 | other cyclic peptide     |                                  | Hapalosiphon                               | sp.                             | Commercial<br>product, USA<br>(freshwater) |
| Hermitamide A               | CyanoMetDB_1<br>487 | other linear non-peptide | Lyngbya toxin                    | <i>Lyngbya/Moorea</i>                      | <i>majuscula/produ-<br/>ens</i> | Papua New<br>Guinea (marine)               |
| Koshikalide                 | CyanoMetDB_1<br>654 | other linear non-peptide |                                  | <i>Lyngbya</i>                             |                                 | Japan (marine)                             |
| Malyngic acid               | CyanoMetDB_1<br>627 | other linear non-peptide |                                  | <i>Lyngbya/Moorea</i>                      | <i>majuscula/produ-<br/>ens</i> | Hawaii (marine)                            |
| MC-RR                       | CyanoMetDB_1<br>802 | Microcystin              |                                  | <i>Microcystis</i>                         | <i>viridis</i>                  | Japan (freshwater)                         |
| Mycosporine-GABA            | CyanoMetDB_1<br>725 | other linear non-peptide | Mycosporine-<br>like amino acids | Nostoc                                     | commune                         | Japan (terrestrial)                        |
| Nakienone A                 | CyanoMetDB_1<br>746 | other linear non-peptide |                                  | <i>Synechocystis</i>                       |                                 | Japan (marine)                             |
| Palmyrolinone               | CyanoMetDB_2<br>408 | other cyclic peptide     | Molluscicide                     | <i>cf. Oscillatoria and<br/>Hormosilla</i> |                                 | Palmyra Atoll<br>(USA, Marine)             |
| Palythine                   | CyanoMetDB_1<br>769 | other linear non-peptide | Mycosporine-<br>like amino acids | Nostoc                                     | sp.                             | India (freshwater)                         |
| Puna'auic acid              | CyanoMetDB_1<br>628 | other linear non-peptide |                                  | <i>Pseudanabaena</i>                       |                                 | Pacific Ocean<br>(marine)                  |
| Sacrolide A                 | CyanoMetDB_1<br>635 | other cyclic non-peptide |                                  | <i>Aphanothece</i>                         | <i>sacrum</i>                   | Japan (freshwater)                         |
| Santacruzamate A            | CyanoMetDB_0<br>233 | other linear non-peptide |                                  | <i>Symploca</i>                            | <i>n.a.</i>                     | Coiba National<br>Park, Panama<br>(marine) |
| Tricholactone               | CyanoMetDB_0<br>040 | other cyclic peptide     | other cyclic<br>depsipeptide     |                                            |                                 | Texas, USA<br>(freshwater)                 |

**Table S13:** Tentatively Identified Cyanometabolites [with confidence levels shown next to name] from Lake MacBride with critical suspect screening results<sup>†</sup>

| Identified Features [conf. level]                              | Calc. MW   | m/z       | Δppm  | RT [min] | MS2                   | FISh Score (when Applicable) |
|----------------------------------------------------------------|------------|-----------|-------|----------|-----------------------|------------------------------|
| 12-hydroxy-2-oxo-11-epi-hinesol [3b]                           | 252.17257  | 251.1653  | 0.12  | 11.049   | DDA for preferred ion | NA (MS2 Not Abundant Enough) |
| 15,16-dihydrosacrolide A [3b]                                  | 310.21412  | 309.20718 | -0.7  | 10.769   | DDA for preferred ion | 0.00                         |
| 35-O-β-6 amino-6-deoxyglucopyranosyl-bacteriohopanetetrol [3a] | 707.53301  | 708.54031 | -0.86 | 14.74    | DDA for preferred ion | 61.90                        |
| 4-Oxo-beta-apo-13-Carotenone [3b]                              | 272.17728  | 273.18456 | -1.51 | 11.211   | No MS2                | 68.25                        |
| 7-methoxy-9-methylhexadecadienoic acid [3b]                    | 296.2352   | 295.22792 | 0.18  | 12.366   | DDA for preferred ion | NA (MS2 Not Abundant Enough) |
| [D-Asp3]MC-HilR [3b]                                           | 994.54672  | 995.5561  | 0.18  | 8.679    | DDA for preferred ion | 0.00                         |
| Aeruginosin 205A [4]                                           | 804.31238  | 805.31965 | -0.86 | 6.139    | No MS2                | NA                           |
| Aeruginosin 850 [4]                                            | 850.46885  | 851.47596 | 0.07  | 6.916    | No MS2                | NA                           |
| Anabaenopeptin 871 [4]                                         | 871.44765  | 870.44147 | -0.39 | 8.694    | No MS2                | NA                           |
| Anabaenopeptin A [2b]                                          | 843.41643  | 844.42319 | -0.31 | 8.071    | DDA for preferred ion | 35.00                        |
| Anabaenopeptin B [4]                                           | 836.4532   | 837.46017 | -1.53 | 6.555    | No MS2                | NA                           |
| Caldorin [4]                                                   | 305.23517  | 306.24245 | -1.01 | 11.731   | No MS2                | NA                           |
| cis-Carboxydihydroanatoxin-a [3a]                              | 211.12085  | 212.12813 | 0.02  | 3.787    | DDA for preferred ion | 42.86                        |
| Dehydroradiosumin [4]                                          | 430.22132  | 431.22859 | -0.71 | 0.982    | No MS2                | NA                           |
| Deoxygadusol [3b]                                              | 188.06846  | 187.06118 | -0.08 | 3.389    | DDA for preferred ion | 0.00                         |
| Radiosumin B [3a]                                              | 444.23684  | 445.24412 | 0.31  | 1.088    | DDA for preferred ion | 72.00                        |
| Gloeolactone [3b]                                              | 292.2035   | 275.20012 | 0.03  | 10.759   | DDA for preferred ion | 0.00                         |
| Hapalindole A-formamide [3b]                                   | 356.16555  | 355.15828 | -0.95 | 13.421   | DDA for preferred ion | 0.00                         |
| Hermitamide A [4]                                              | 359.28209  | 360.28936 | -0.1  | 7.151    | No MS2                | NA                           |
| Koshikalide [3a]                                               | 294.18308  | 293.17606 | -0.8  | 11.385   | DDA for preferred ion | 86.62                        |
| Malyngic acid [3a]                                             | 328.22491  | 327.21764 | -0.14 | 8.314    | DDA for preferred ion | 100.00                       |
| MC-RR [2b]                                                     | 1037.56429 | 519.79011 | -0.95 | 7.513    | DDA for other ion     | 60.00                        |

|                       |           |           |       |        |                       |                              |
|-----------------------|-----------|-----------|-------|--------|-----------------------|------------------------------|
| Mycosporine-GABA [4]  | 273.12098 | 274.12825 | -0.64 | 5.257  | No MS2                | NA                           |
| Nakienone A [4]       | 194.09417 | 193.08689 | -0.36 | 10.027 | No MS2                | NA                           |
| Palmyrolinone [3a]    | 237.10002 | 238.10729 | -0.81 | 3.443  | DDA for preferred ion | 39.47                        |
| Palythine [3b]        | 244.10572 | 245.11299 | -0.98 | 0.905  | DDA for preferred ion | 0.00                         |
| Puna'auic acid [3b]   | 312.22975 | 311.22287 | -0.96 | 11.161 | DDA for preferred ion | NA (MS2 Not Abundant Enough) |
| Sacrolide A [3b]      | 308.19845 | 307.19148 | -1.06 | 9.858  | DDA for preferred ion | 0.00                         |
| Santacruzamate A [3b] | 278.1629  | 279.17015 | -0.18 | 3.821  | DDA for preferred ion | 15.38                        |
| Tricholactone [3a]    | 254.1516  | 253.14454 | -0.83 | 9.891  | DDA for preferred ion | 93.33                        |

<sup>†</sup>NOTES: MW="molecular weight" (Da); m/z=mass to charge ratio; Δppm=mass error (parts per million); RT="retention time"; MS2 DDA= "Data Dependent Acquisition" for fragment ions; FISh="Fragment Ion Search" score

**Table S14:** Lake MacBride Tentatively Identified Compounds with annotated MS2 Spectra and structure for applicable features and identification confidence level in []

*12-hydroxy-2-oxo-11-epi-hinesol [3b]*

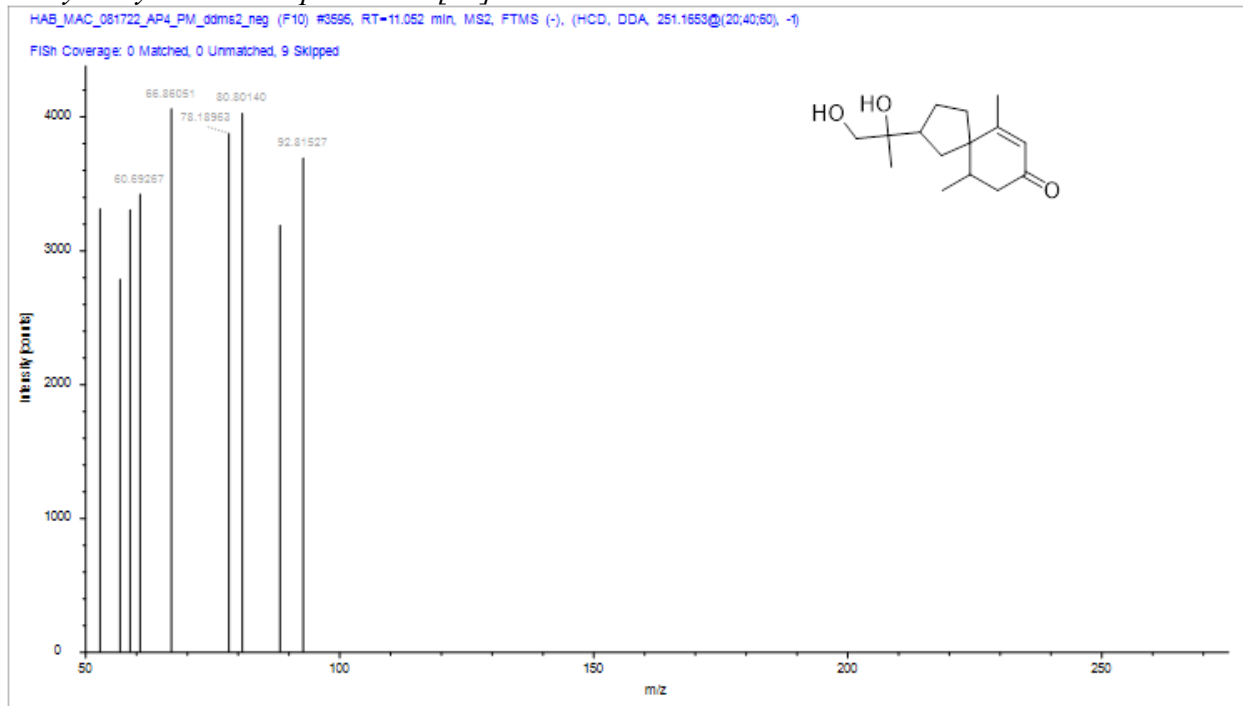

*15,16-dihydrosacrolide A [3b]*

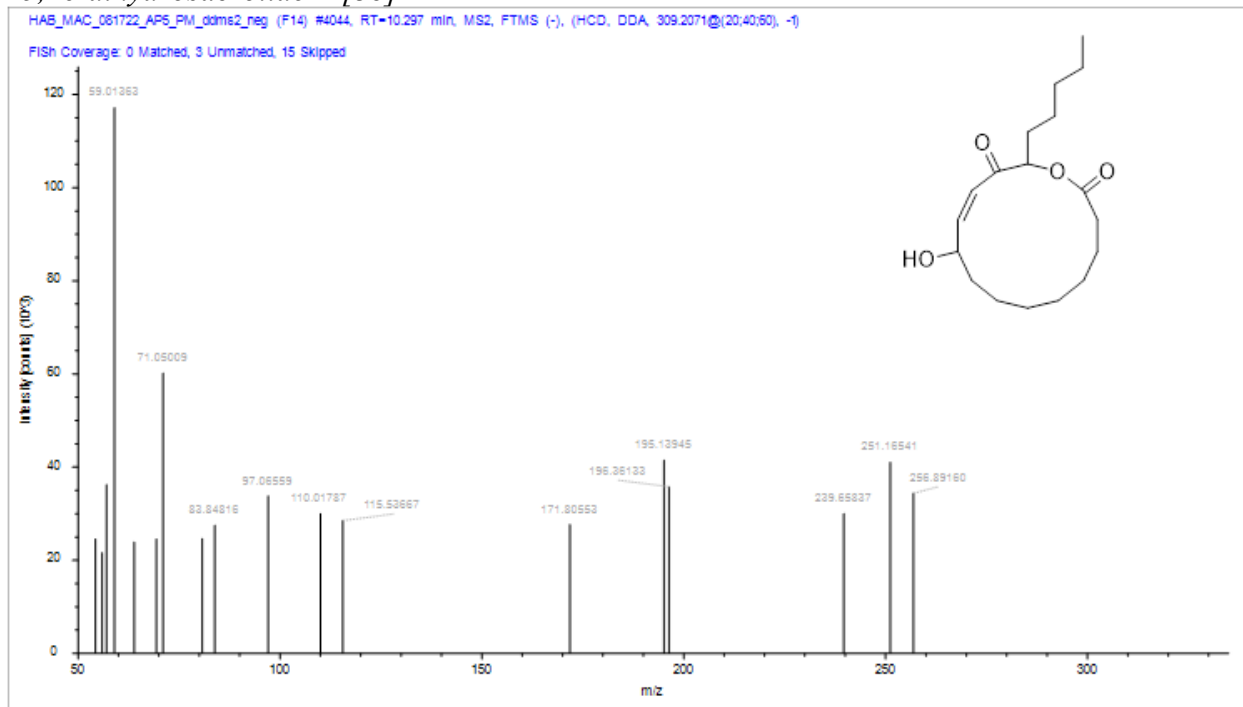

### 35-O-β-6 amino-6-deoxyglucopyranosyl-bacteriohopanetetrol [3a]

HAB\_MAC\_081722\_AP5\_PM\_ddms2\_pos (F15) #5864, RT=14.720 min, MS2, FTMS (+), (HCD, DDA, 708.5396@(20:40:60), +1)

FISH Coverage: 7 Matched, 5 Unmatched, 16 Skipped

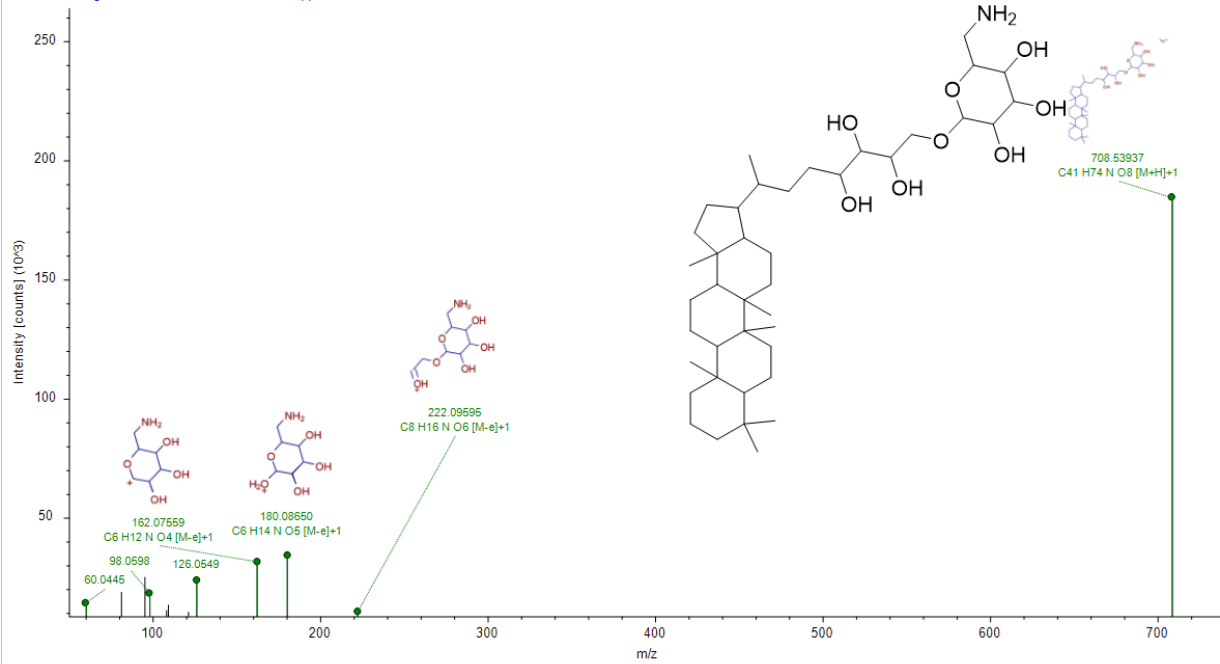

### 4-Oxo-beta-apo-13-Carotenone [3a]

HAB\_MAC\_081722\_AP5\_PM\_ddms2\_pos (F15) #4220, RT=10.531 min, MS2, FTMS (+), (HCD, DDA, 273.1843@(20:40:60), +1)

FISH Coverage: 43 Matched, 20 Unmatched, 24 Skipped

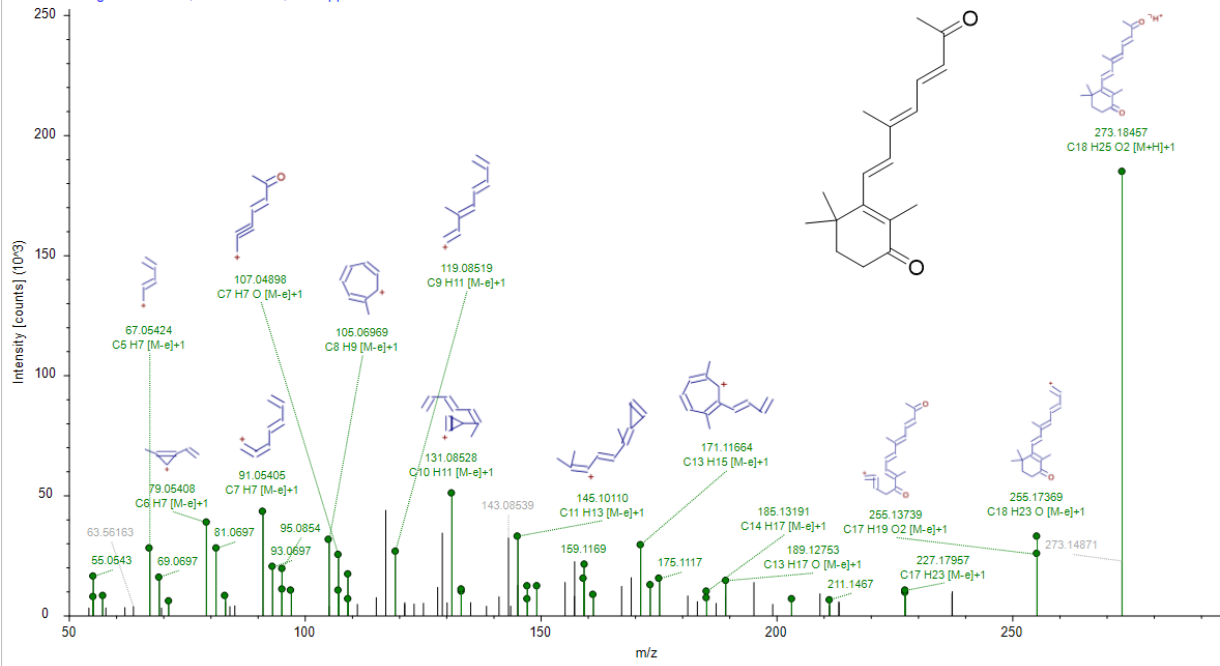

### 7-methoxy-9-methylhexadecadienoic acid[3b]

HAB\_MAC\_081722\_1\_PM\_ddms2\_neg (F2) #4198, RT=12.407 min, MS2, FTMS (-), (HCD, DDA, 295.2278@(20:40:60), -1)

FISH Coverage: 0 Matched, 0 Unmatched, 10 Skipped

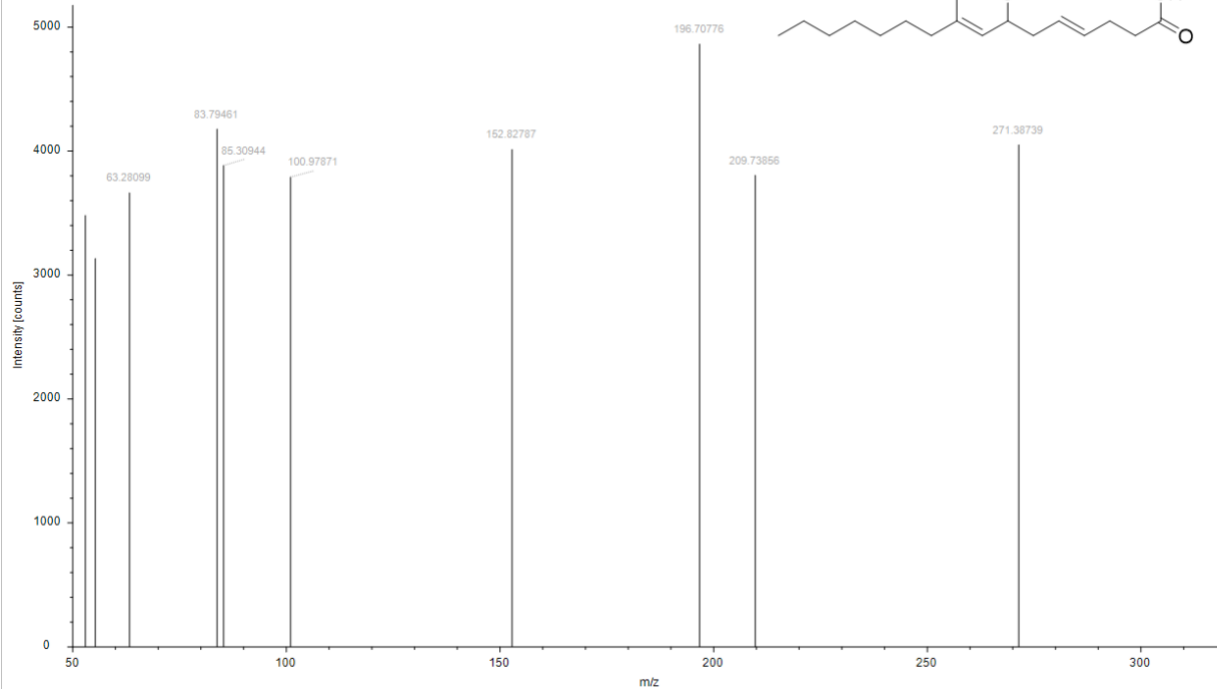

### [D-Asp3]MC-HiR [3b]

HAB\_MAC\_081722\_AP5\_PM\_ddms2\_neg (F14) #3398, RT=8.722 min, MS2, FTMS (-), (HCD, DDA, 993.5421@(20:40:60), -1)

FISH Coverage: 0 Matched, 7 Unmatched, 20 Skipped

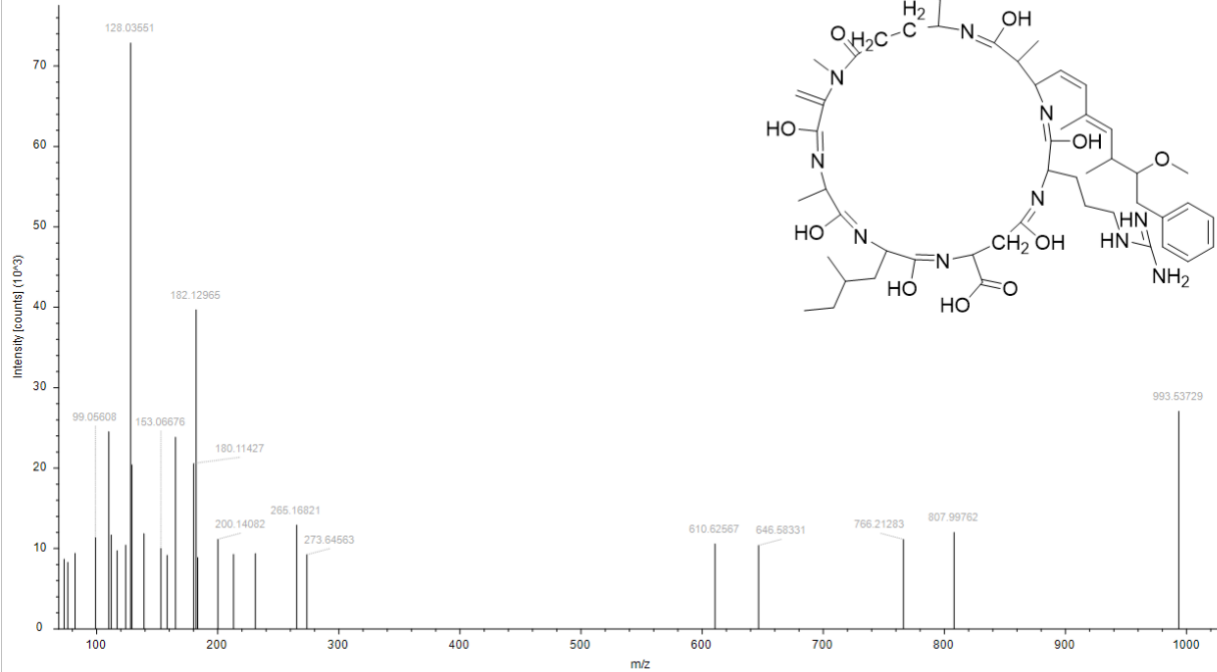

*Aeruginosin 205A* (No MS2) [4]

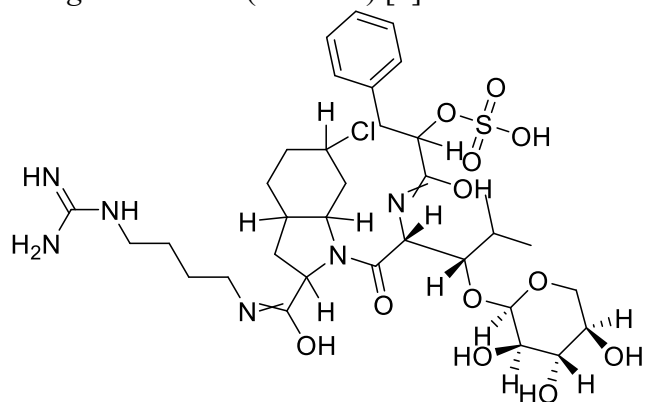

*Aeruginosin 850* (No MS2) [4]

*Anabaenopeptin 871* (No MS2) [4]

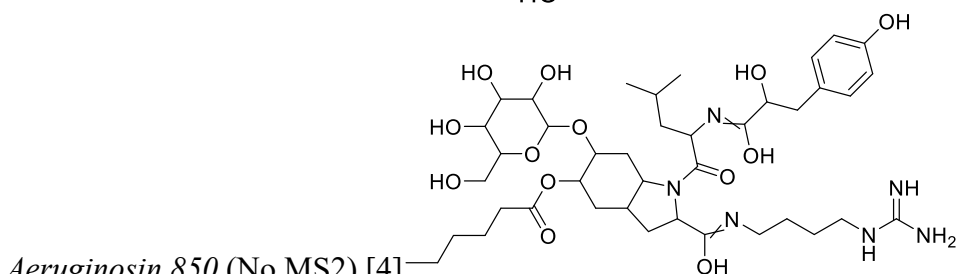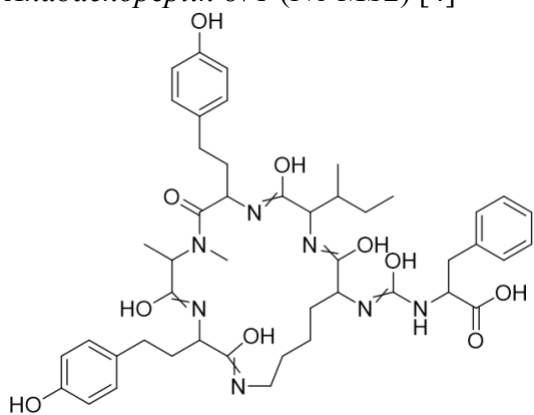

*Anabaenopeptin A* [2b]

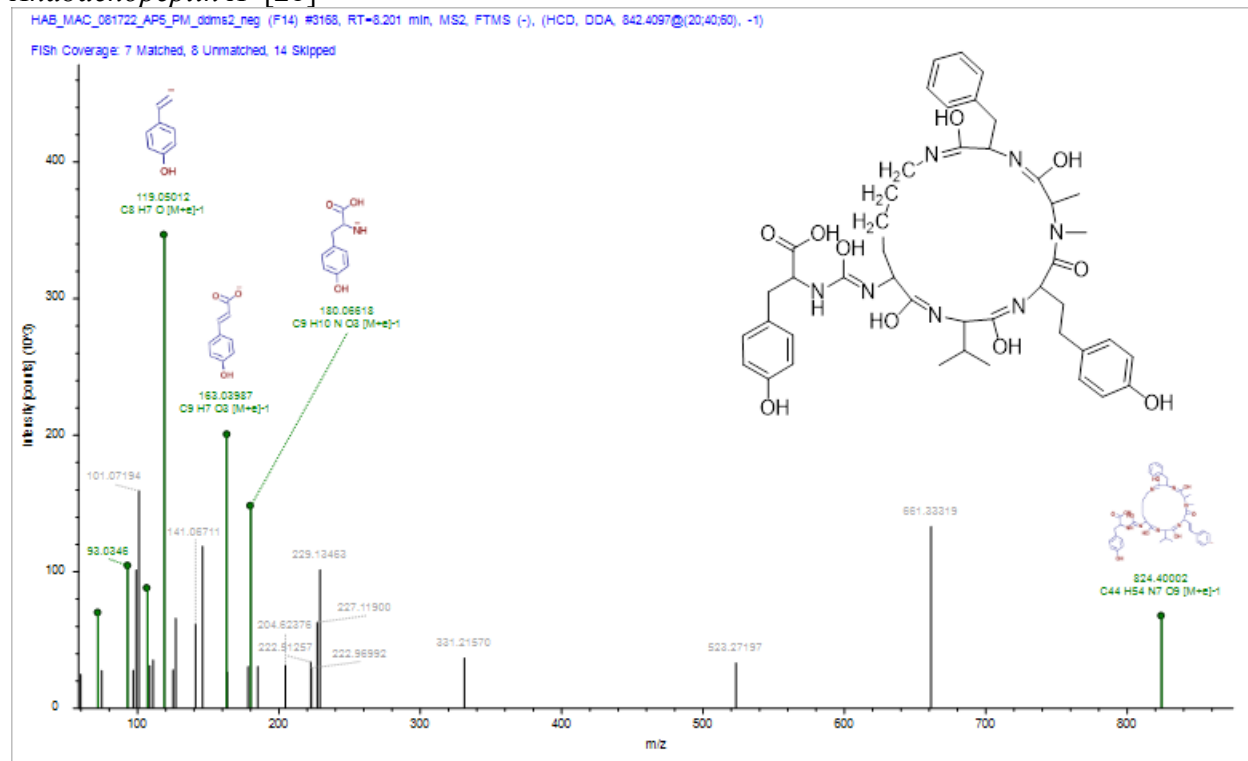

*Anabaenopeptin B* (No MS2) [4]

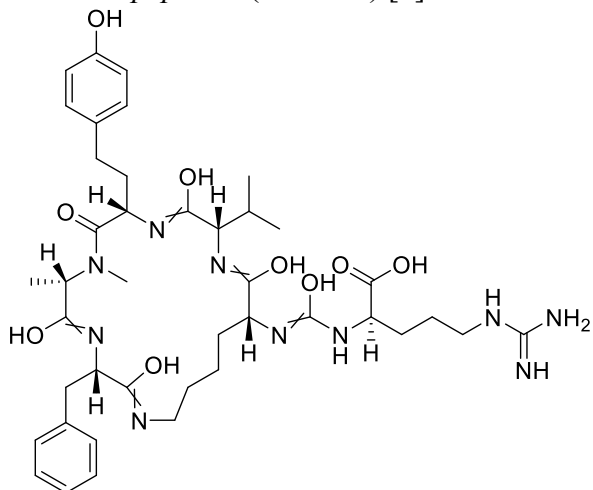

*Caldorin* (No MS2) [4]

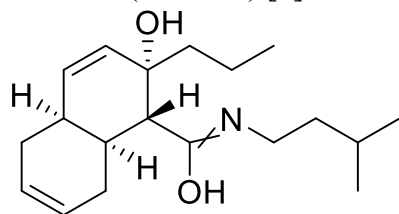

*cis*-Carboxyhydroanatoxin-a [3a]

HAB\_MAC\_081722\_AP4\_PM\_ddms2\_pos (F11) #1480, RT=3.791 min, MS2, FTMS (+), (HCD, DDA, 212.1644@20.40:60, +1)

FISH Coverage: 6 Matched, 8 Unmatched, 20 Skipped

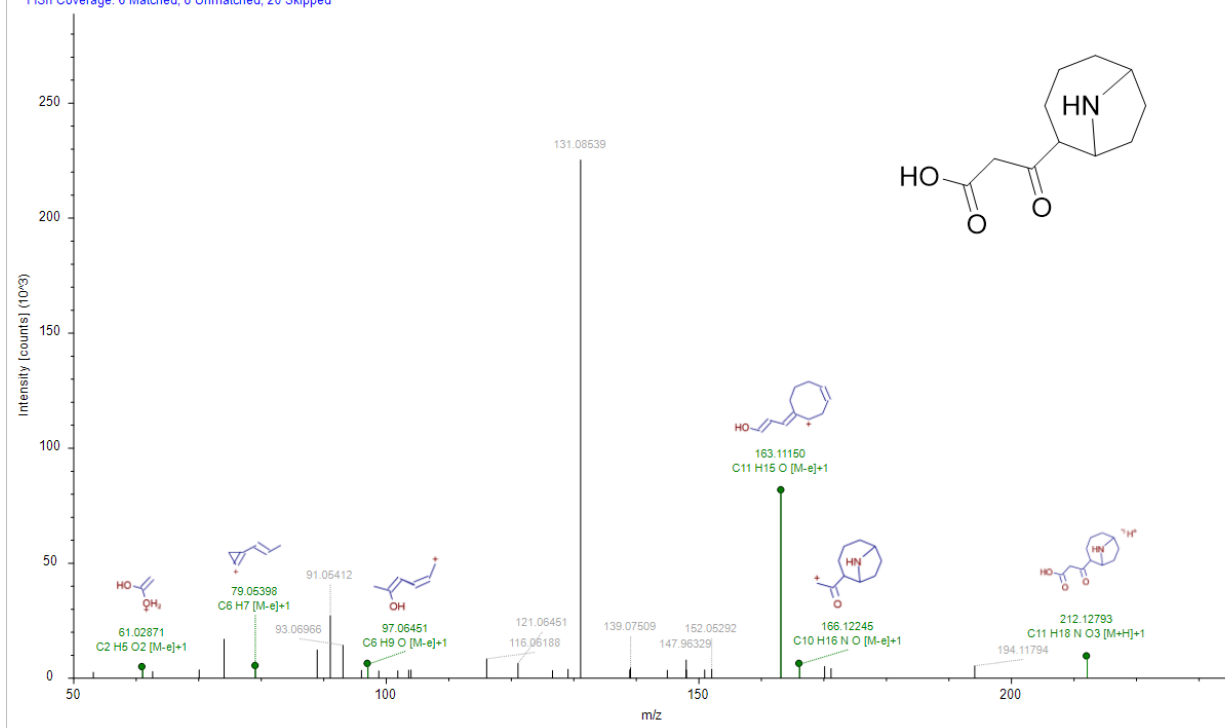

Dehydroradiosumin (No MS2) [4]

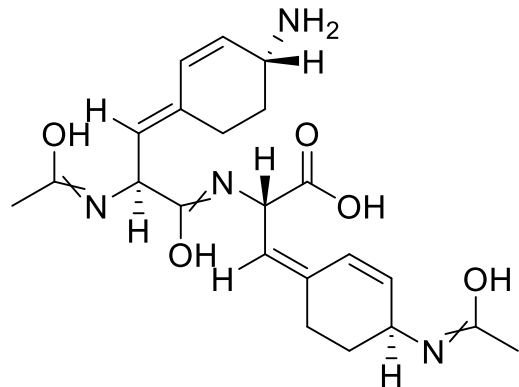

### Deoxygadusol [3b]

HAB\_MAC\_081722\_2\_PM\_ddms2\_neg (F6) #1230, RT=3.415 min, MS2, FTMS (-), (HCD, DDA, 187.0612@(20:40:60), -1)

FISH Coverage: 0 Matched, 2 Unmatched, 5 Skipped

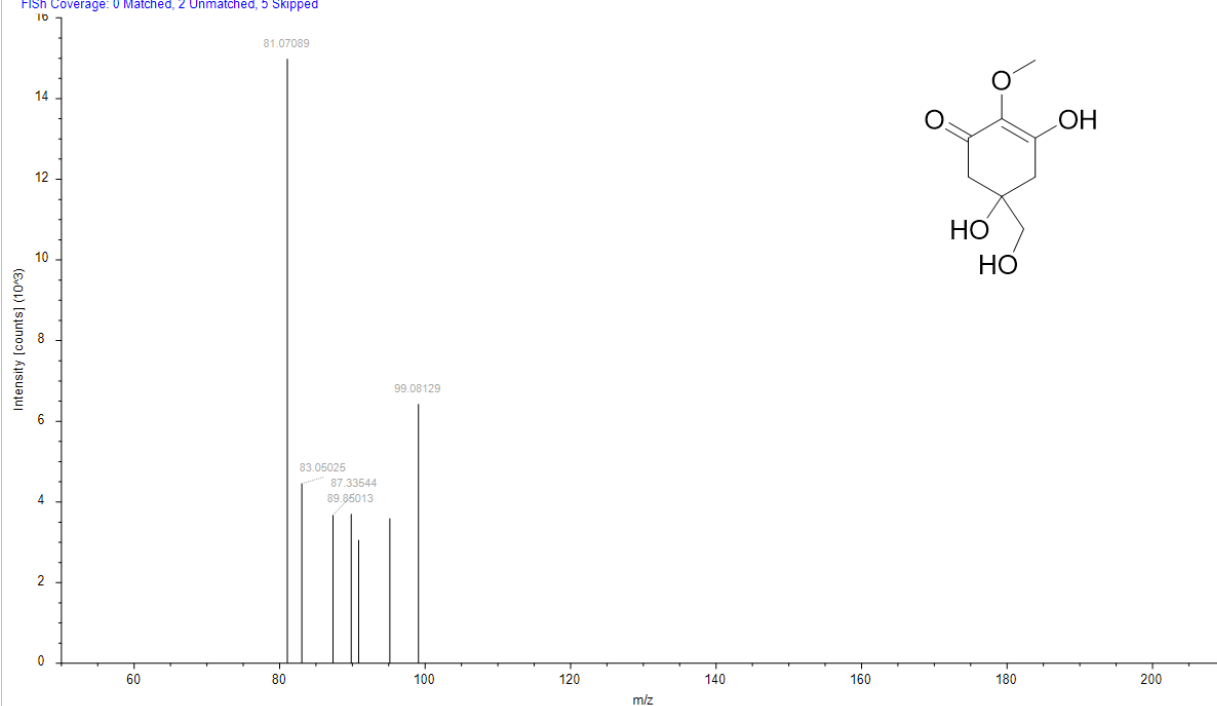

### Radiosumin B [3a]

HAB\_MAC\_081722\_AP5\_PM\_ddms2\_pos (F15) #478, RT=1.233 min, MS2, FTMS (+), (HCD, DDA, 445.2440@(20:40:60), +1)

FISH Coverage: 30 Matched, 9 Unmatched, 22 Skipped

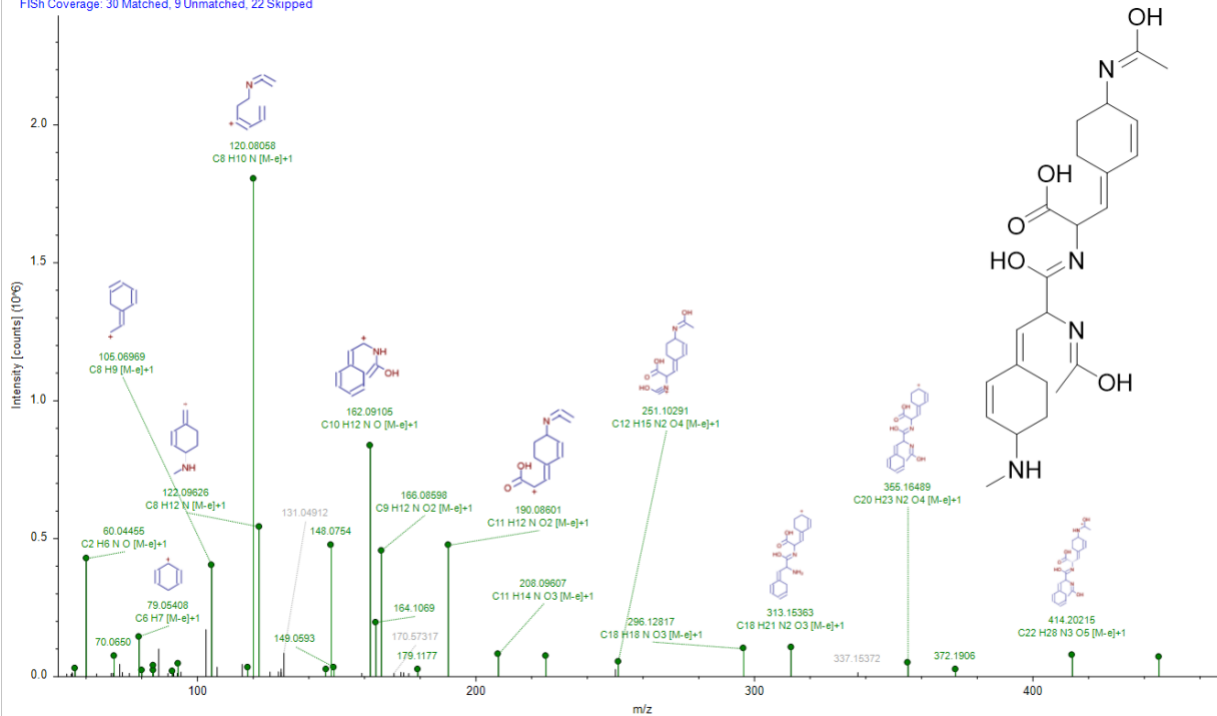

### Gloeolactone [3b]

HAB\_MAC\_081722\_1\_PM\_ddms2\_neg (F2) #3902, RT=11.456 min, MS2, FTMS (-), (HCD, DDA, 291.1967@(20:40:60), -1)

FISH Coverage: 0 Matched, 0 Unmatched, 9 Skipped

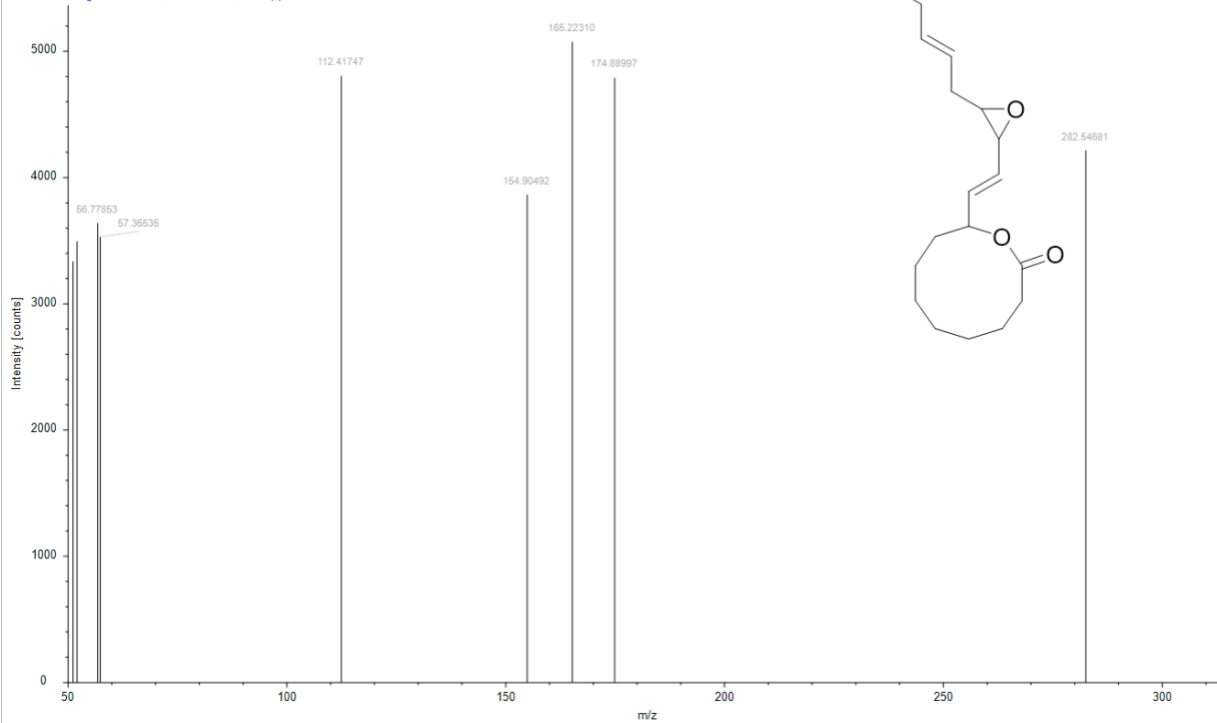

### Hapalindole A-formamide [3b]

HAB\_MAC\_081722\_2\_PM\_ddms2\_neg (F6) #4321, RT=13.428 min, MS2, FTMS (-), (HCD, DDA, 355.1581@(20:40:60), -1)

FISH Coverage: 0 Matched, 3 Unmatched, 10 Skipped

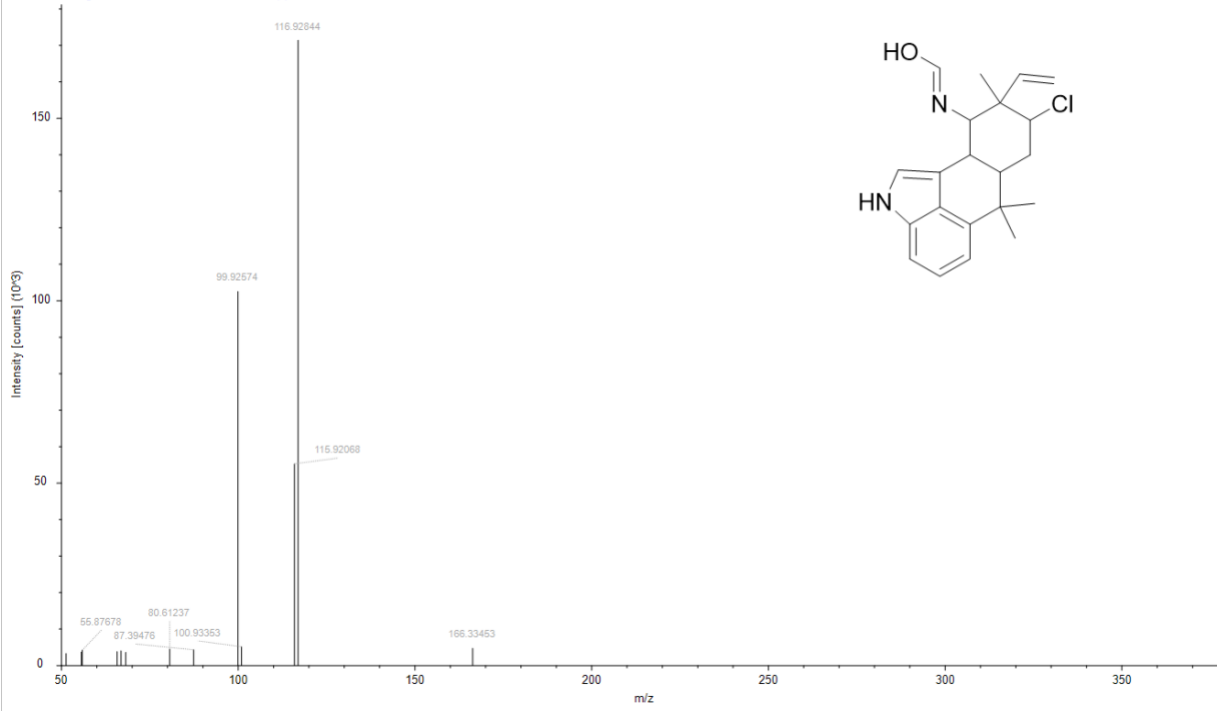

*Hermitamide A* (No MS2) [4]

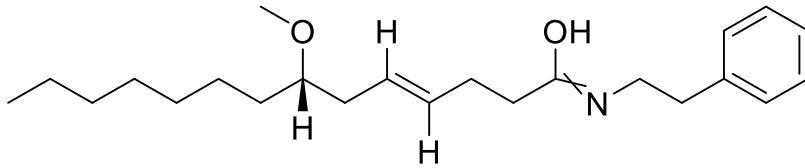

*Koshikalide* [3a]

HAB\_MAC\_081722\_AP5\_PM\_ddms2\_pos (F15) #4559, RT=11.387 min, MS2, FTMS (+), (HCD, DDA, 295.1899@20.40:60), +1

FISH Coverage: 46 Matched, 4 Unmatched, 13 Skipped

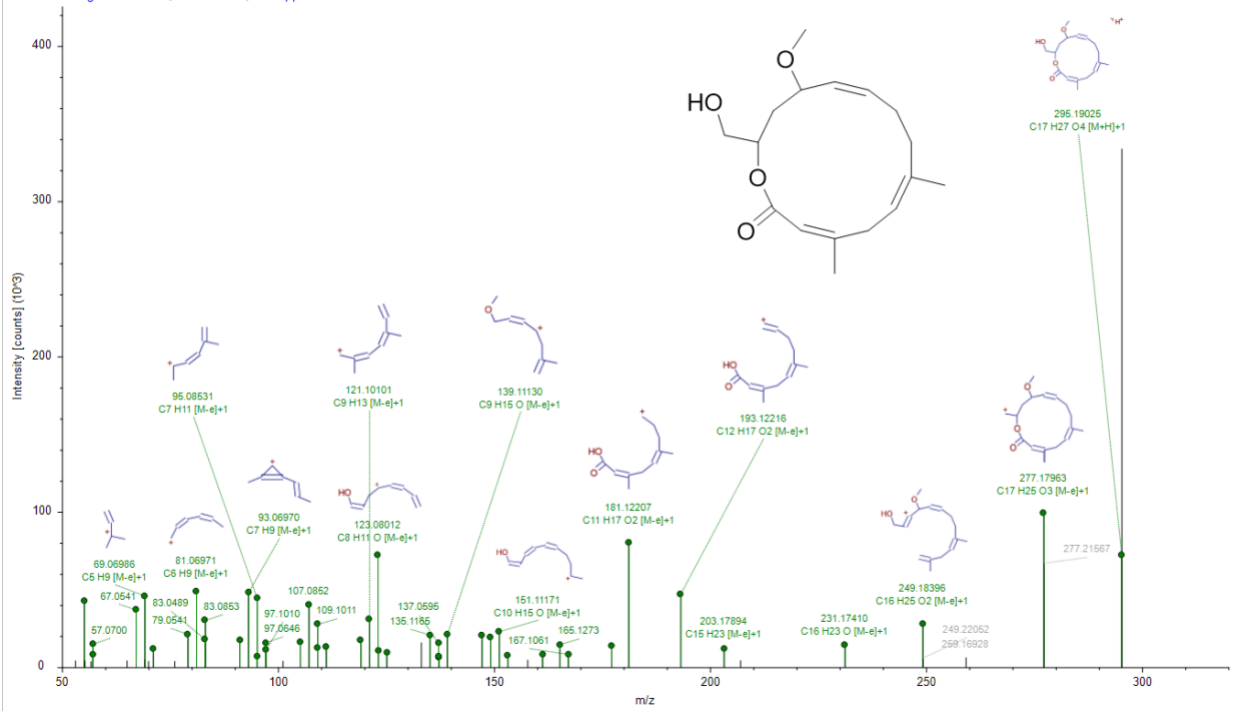

### Malyngic acid [3a]

HAB\_MAC\_081722\_AP5\_PM\_ddms2\_neg (F14) #3252, RT=8.298 min, MS2, FTMS (-), (HCD, DDA, 327.2176@20.40:60), -1)

FISH Coverage: 9 Matched, 0 Unmatched, 10 Skipped

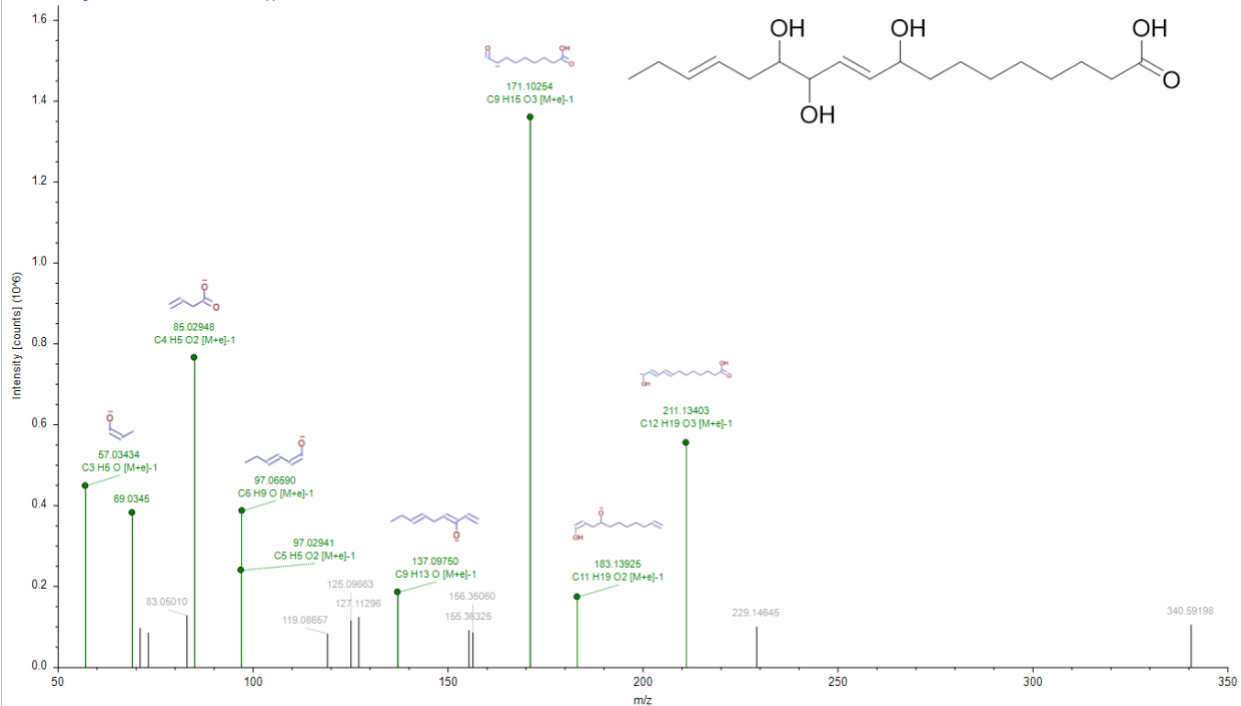

### MC-RR [2b]

HAB\_MAC\_081722\_1\_PM\_ddms2\_pos (F3) #2944, RT=7.503 min, MS2, FTMS (+), (HCD, DDA, 519.7903@20.40:60), +2)

FISH Coverage: 10 Matched, 6 Unmatched, 18 Skipped

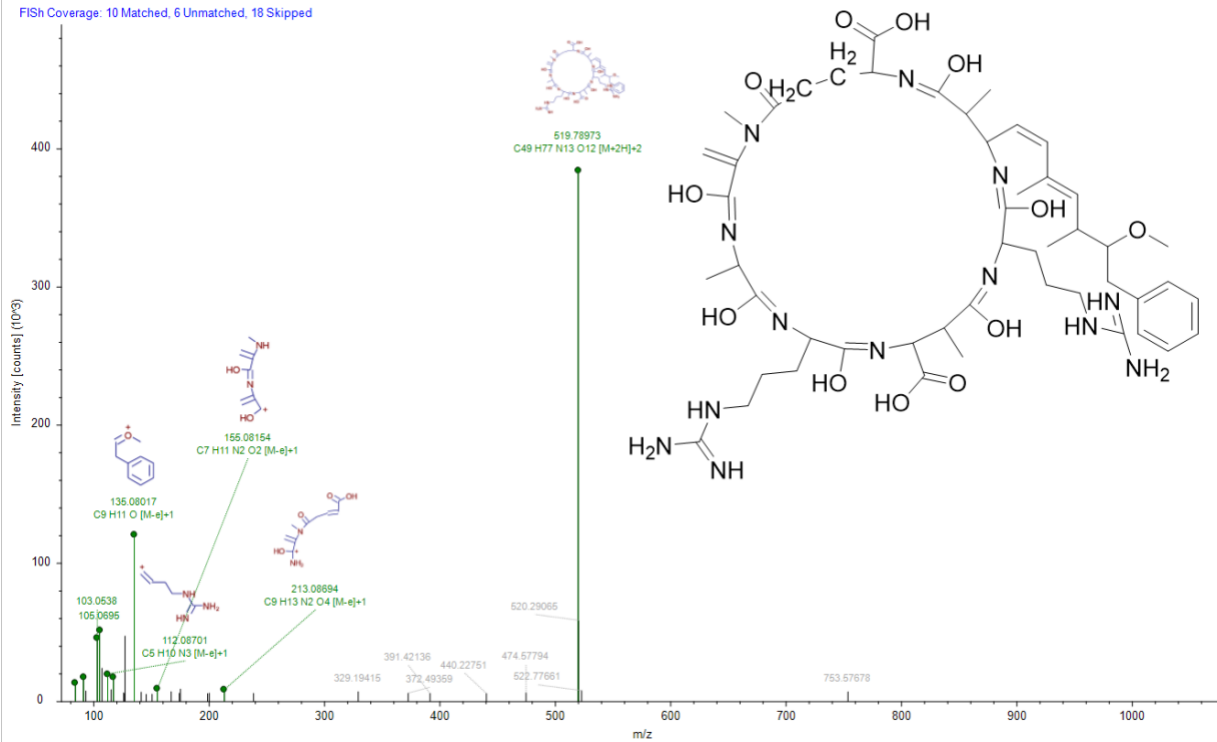

*Mycosporine-GABA* (No MS2) [4]

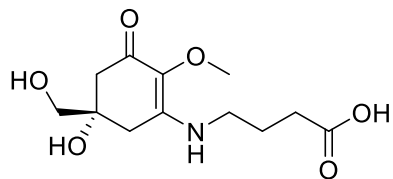

*Nakienone A* (No MS2) [4]

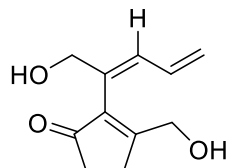

*Palmyrrolinone [3a]*

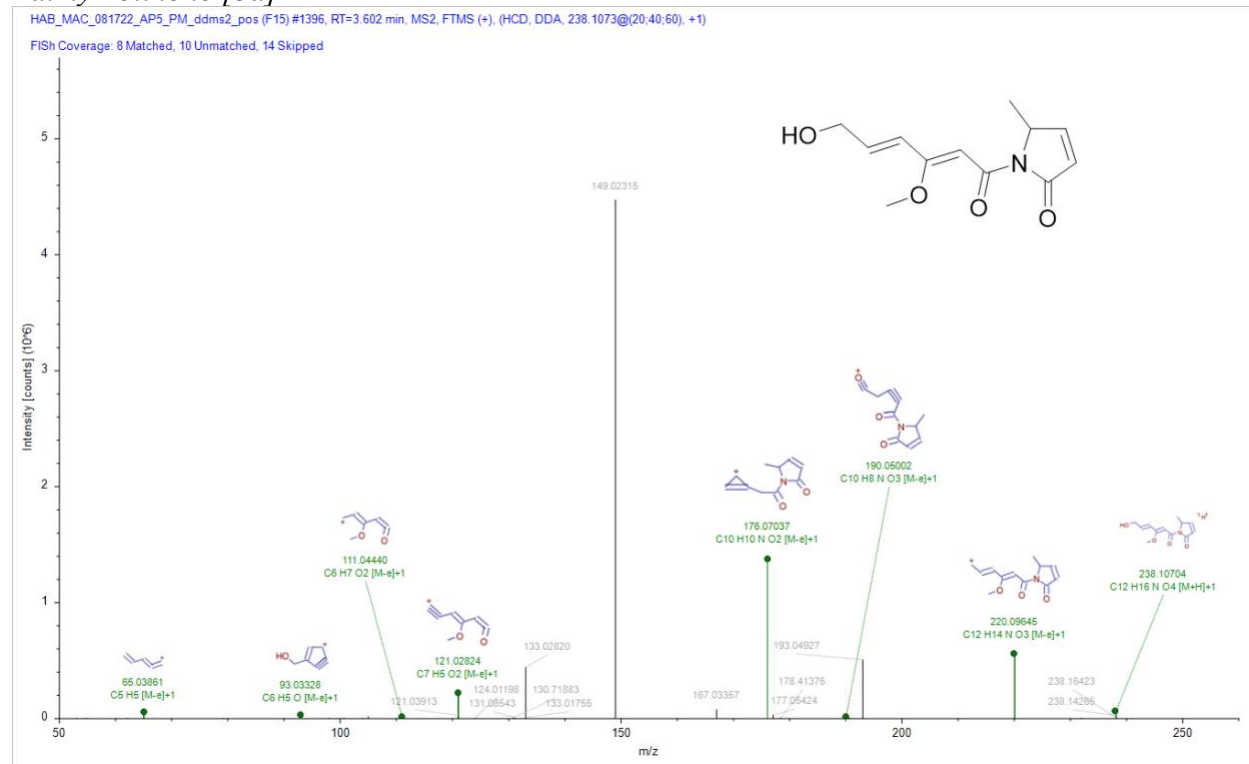

### Palythine [3b]

HAB\_MAC\_081722\_1\_PM\_ddms2\_pos (F3) #443, RT=1.098 min, MS2, FTMS (+), (HCD, DDA, 245.0992@(20:40:60), +1)

FISH Coverage: 0 Matched, 5 Unmatched, 13 Skipped

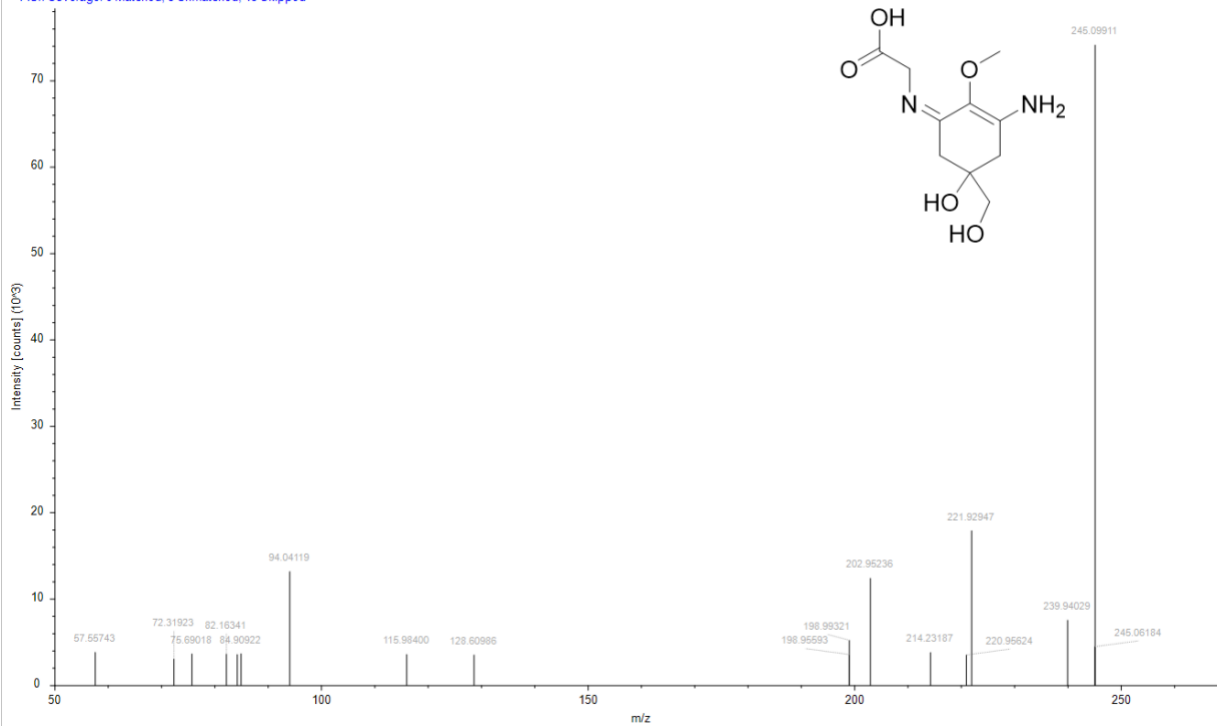

### Puna'auic acid [3b]

HAB\_MAC\_081722\_AP4\_PM\_ddms2\_neg (F10) #3623, RT=11.151 min, MS2, FTMS (-), (HCD, DDA, 311.1865@(20:40:60), -1)

FISH Coverage: 0 Matched, 0 Unmatched, 7 Skipped

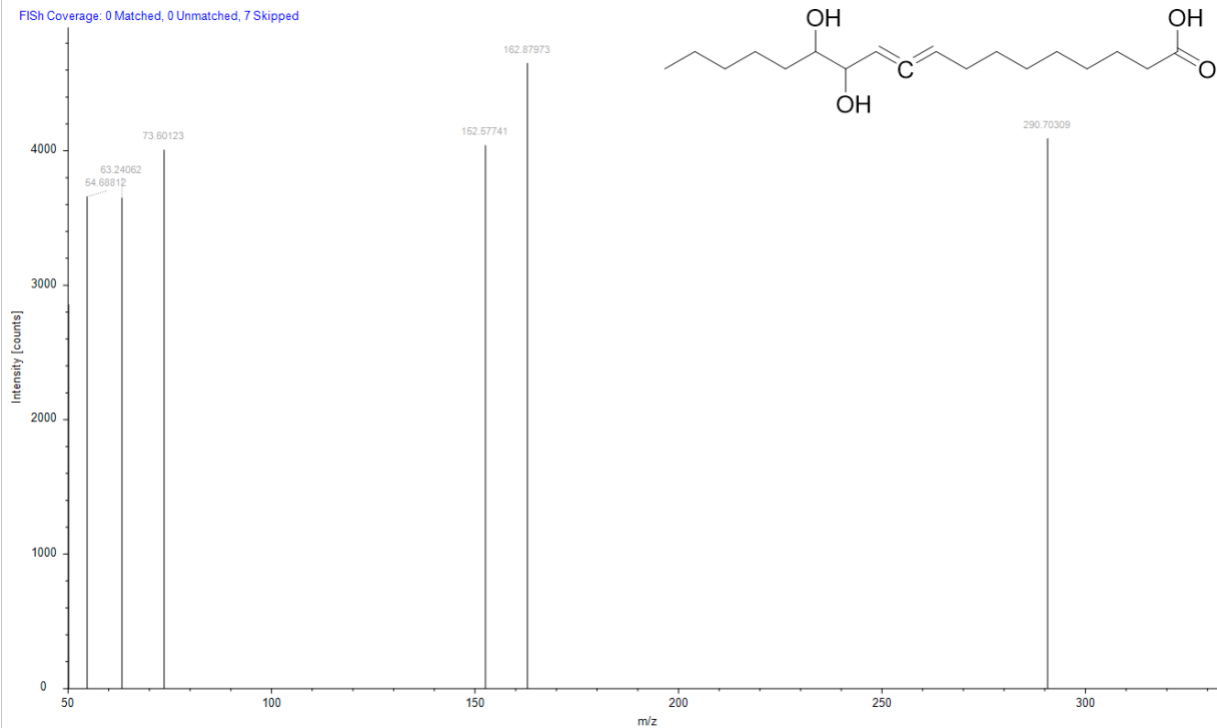

### Sacrolide A [3b]

HAB\_MAC\_081722\_AP5\_PM\_ddms2\_neg (F14) #3880, RT=9.887 min, MS2, FTMS (-), (HCD, DDA, 307.1915@(20:40:60), -1)

FISH Coverage: 0 Matched, 9 Unmatched, 13 Skipped

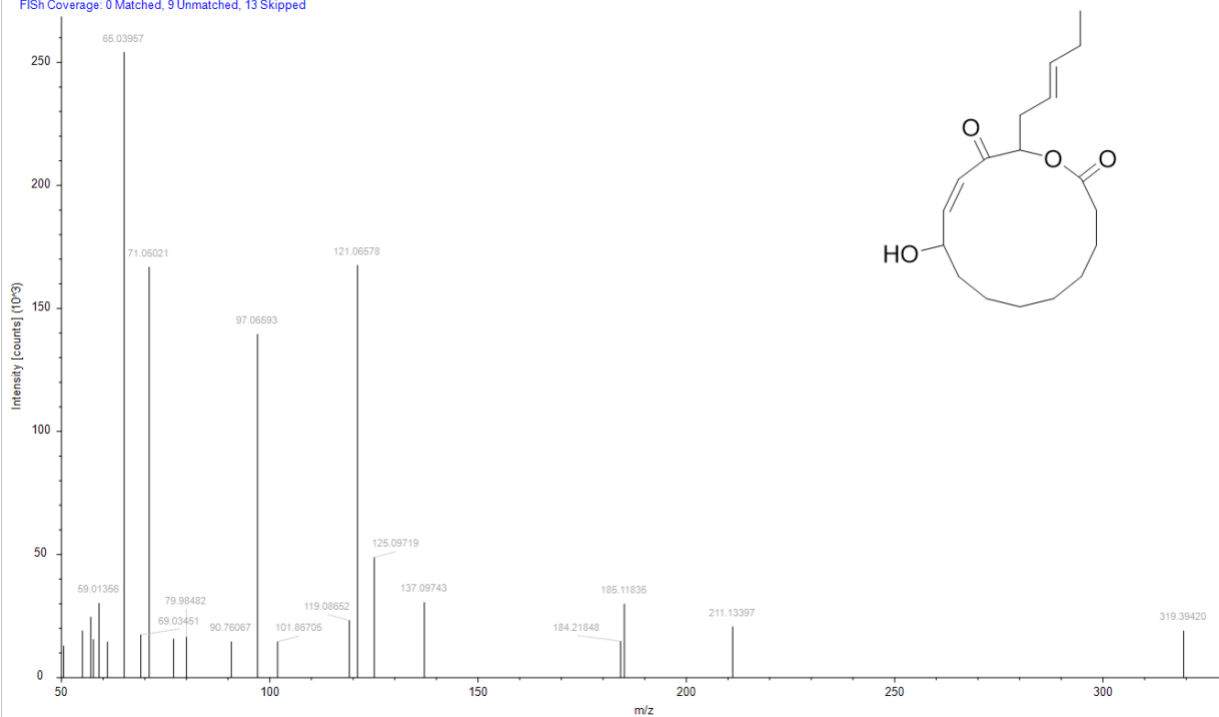

### Santacruzamate A [3b]

HAB\_MAC\_081722\_1\_PM\_ddms2\_pos (F3) #1212, RT=3.079 min, MS2, FTMS (+), (HCD, DDA, 279.1588@(20:40:60), +1)

FISH Coverage: 2 Matched, 11 Unmatched, 18 Skipped

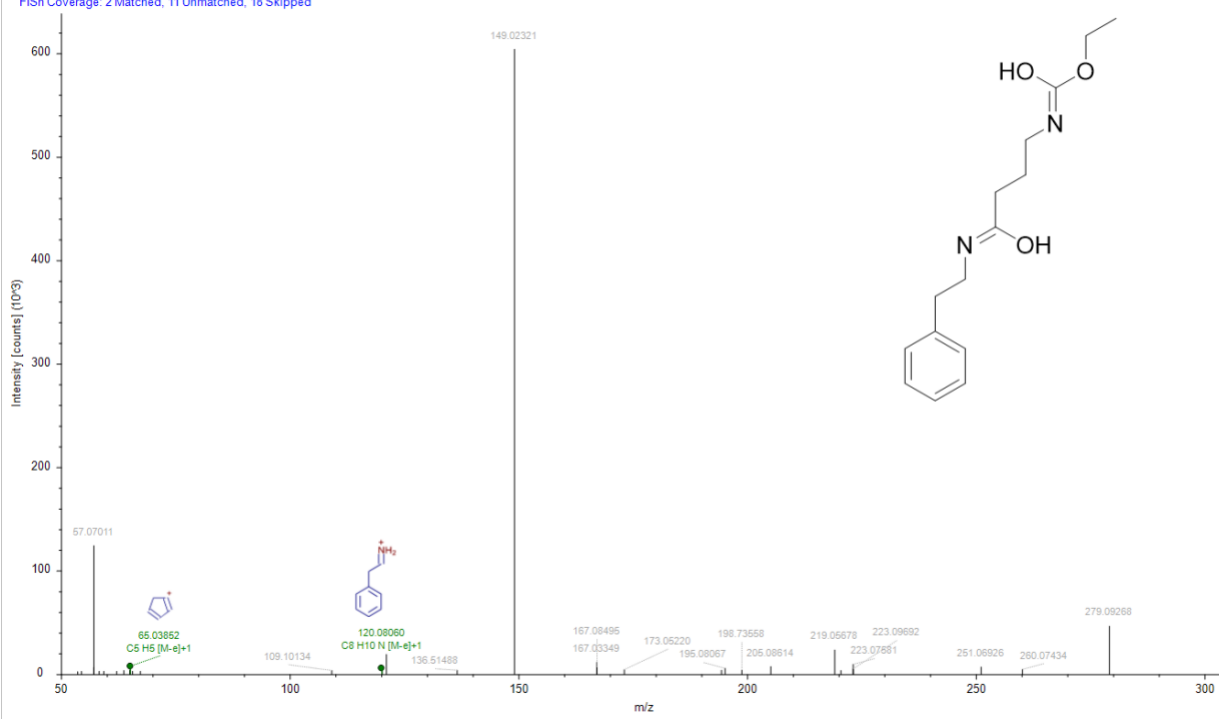

### Tricholactone [3a]

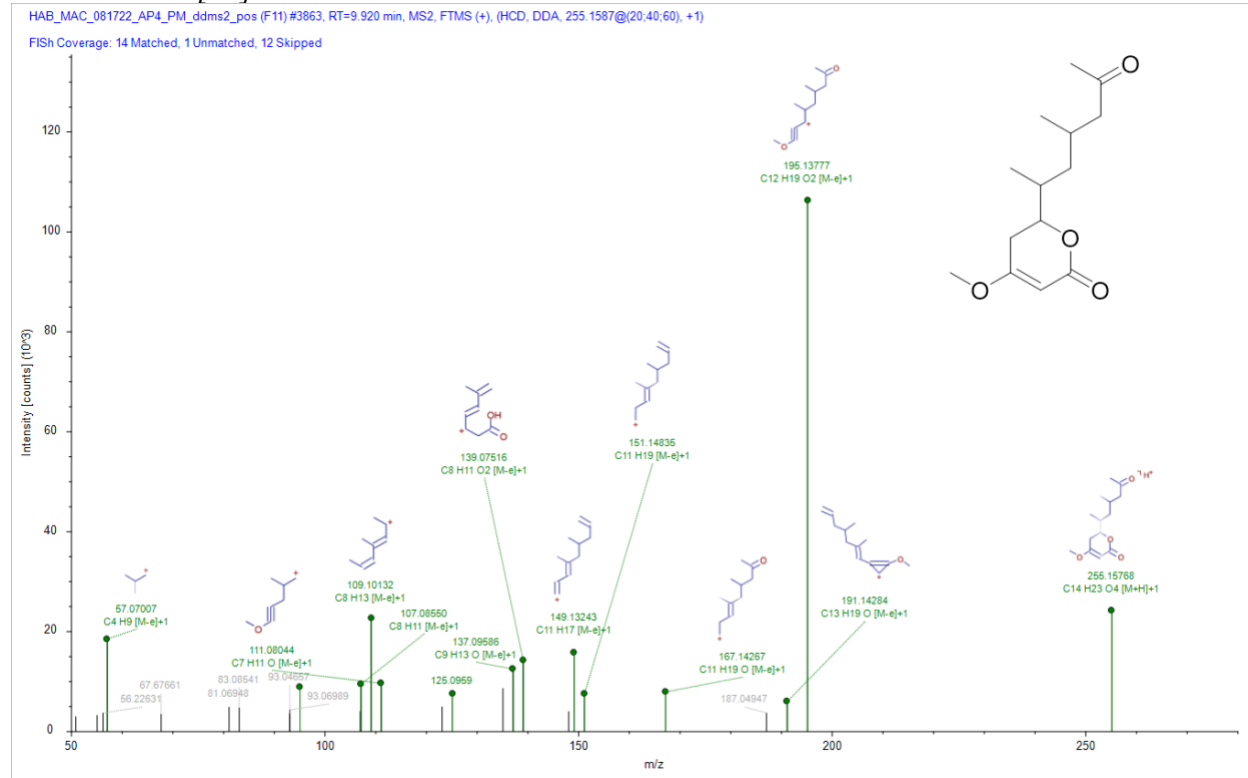

**Table S15:** Cosine theta values for the filtered (cyanometDB matched) results from Lake MacBride (based on normalized responses for each feature). The green highlight indicates  $\cos(\theta) > 0.85$ .

| Site    | North 1 | North 2 | South 2 | South 1 |
|---------|---------|---------|---------|---------|
| North 1 | 1.000   | 0.562   | 0.534   | 0.452   |
| North 2 |         | 1.000   | 0.984   | 0.375   |
| South 2 |         |         | 1.000   | 0.378   |
| South 1 |         |         |         | 1.000   |

**Table S16:** Tentatively Identified Cyanometabolites from Lake Darling and their associated information as reported in the CyanMetDB.

| Identified Features                    | Cyanomet_ID     | Compound Class           | Alternative Class name       | Genus initial reported in                                           | Species initial reported in                              | Original ID Location        |
|----------------------------------------|-----------------|--------------------------|------------------------------|---------------------------------------------------------------------|----------------------------------------------------------|-----------------------------|
| [D-Asp <sup>3</sup> ]MC-HilR           | CyanoMetDB_1821 | Microcystin              |                              | <i>Planktothrix</i> ;<br><i>Dolichospermum</i> /<br><i>Anabaena</i> | <i>[Planktothrix]sp.</i> ;<br><i>[Dolichospermum]sp.</i> | Germany (freshwater)        |
| 11-Carboxyanatoxin-a                   | CyanoMetDB_1742 | Anatoxin-a               |                              | <i>Aphanizomenon</i>                                                | <i>issatschenkoi</i>                                     | New Zealand (Freshwater)    |
| 15,16-dihydrosacrolide A               | CyanoMetDB_1632 | other cyclic non-peptide |                              | <i>Aphanothece</i>                                                  | <i>sacrum</i>                                            | Japan (freshwater)          |
| 478-Da MAA                             | CyanoMetDB_1603 | other linear non-peptide | Mycosporine-like amino acids | Nostoc                                                              | commune                                                  | Japan (Freshwater)          |
| 6-Acetamidotridecane                   | CyanoMetDB_1685 | other linear non-peptide | Zacetamide                   | <i>Microcoleus</i>                                                  | <i>lyngbyaceus</i>                                       | Chuuk Island Atoll (marine) |
| 7-methoxy-9-methylhexadecadienoic acid | CyanoMetDB_1629 | other linear non-peptide |                              | <i>Lyngbya</i>                                                      | <i>aestuarii</i>                                         | Hawaii (marine)             |
| Gloeolactone                           | CyanoMetDB_1638 | other linear non-peptide |                              | <i>Gloeotrichia</i>                                                 |                                                          | Montana, USA (freshwater)   |
| Koshikalide                            | CyanoMetDB_1654 | other linear non-peptide |                              | <i>Lyngbya</i>                                                      |                                                          | Japan (marine)              |
| Lyngbyacarbonate                       | CyanoMetDB_0286 | other linear non-peptide |                              | <i>Lyngbya/Moorea</i>                                               | <i>majuscula/producing</i>                               | Oregon, USA (marine)        |
| Malyngic acid                          | CyanoMetDB_1627 | other linear non-peptide |                              | <i>Lyngbya/Moorea</i>                                               | <i>majuscula/producing</i>                               | Hawaii (marine)             |
| MC-RR                                  | CyanoMetDB_1802 | Microcystin              |                              | <i>Microcystis</i>                                                  | <i>viridis</i>                                           | Japan (freshwater)          |
| Microcystbiopterin A                   | CyanoMetDB_1641 | other linear non-peptide |                              | <i>Microcystis</i>                                                  |                                                          | Israel, (freshwater)        |
| N-butryl-L-homoserine lactone          | CyanoMetDB_0294 | other linear non-peptide | AHLs                         | <i>Lyngbya/Moorea</i>                                               | <i>majuscula/producing</i>                               | Hawaii (marine)             |
| Palmyrolinone                          | CyanoMetDB_2408 | other cyclic peptide     |                              | <i>cf. Oscillatoria and Hormosilla</i>                              |                                                          | Palmyra Atoll (USA, Marine) |
| Palythene                              | CyanoMetDB_1711 | other linear non-peptide | Mycosporine-like amino acids | <i>Aphanothece</i>                                                  | <i>halophytica</i>                                       | India (freshwater)          |
| Pukeleimide D                          | CyanoMetDB_1713 | other linear non-peptide | Pukeleimide                  | <i>Lyngbya/Moorea</i>                                               | <i>majuscula/producing</i>                               | Hawaii (marine)             |
| Puna'auic acid                         | CyanoMetDB      | other linear             |                              | <i>Pseudanabaena</i>                                                |                                                          | Pacific ocean (marine)      |

|               |                     |                             |                              |                    |               |                         |
|---------------|---------------------|-----------------------------|------------------------------|--------------------|---------------|-------------------------|
|               | _1628               | non-peptide                 |                              |                    |               |                         |
| Sacrolide A   | CyanoMetDB<br>_1635 | other cyclic<br>non-peptide |                              | <i>Aphanothece</i> | <i>sacrum</i> | Japan (freshwater)      |
| Tricholactone | CyanoMetDB<br>_0040 | other cyclic<br>peptide     | other cyclic<br>depsipeptide |                    |               | Texas, USA (freshwater) |

**Table S17:** Tentatively Identified Cyanometabolites from Lake Darling with critical suspect screening results<sup>†</sup>

| Identified Features                         | Calc. MW   | m/z       | RT [min] | $\Delta$ ppm | MS2                   | FISh Score (when Applicable) |
|---------------------------------------------|------------|-----------|----------|--------------|-----------------------|------------------------------|
| [D-Asp3]MC-HilR [4]                         | 994.54672  | 995.55385 | 8.678    | -2.06        | No MS2                | NA                           |
| 11-Carboxyanatoxin-a [4]                    | 209.10498  | 210.11225 | 0.794    | -1.01        | No MS2                | NA                           |
| 15,16-dihydrosacrolide A [3b]               | 310.21411  | 309.20703 | 10.757   | -0.96        | DDA for preferred ion | NA (MS2 not abundant enough) |
| 478-Da MAA [3b]                             | 478.17935  | 477.17246 | 0.883    | -1.09        | DDA for preferred ion | 100.00                       |
| 6-Acetamidotridecane [4]                    | 241.24006  | 242.24734 | 10.03    | -2.09        | No MS2                | NA                           |
| 7-methoxy-9-methylhexadecadienoic acid [3b] | 296.23486  | 295.22758 | 12.349   | -0.96        | DDA for preferred ion | NA (MS2 not abundant enough) |
| Gloeolactone [3b]                           | 292.20378  | 291.1965  | 11.4     | -0.23        | DDA for preferred ion | NA (MS2 not abundant enough) |
| Koshikalide [3b]                            | 294.18291  | 293.17563 | 10.375   | -0.68        | DDA for preferred ion | 0.00                         |
| Lyngbyacarbonate [4]                        | 232.05818  | 231.05088 | 0.793    | -0.54        | No MS2                | NA                           |
| Malyngic acid [3b]                          | 328.22468  | 327.21751 | 8.291    | -0.91        | DDA for preferred ion | NA (MS2 not abundant enough) |
| MC-RR [2b]                                  | 1037.56429 | 519.78942 | 7.498    | -1.47        | DDA for other ion     | 63.64                        |
| Microcystbiopterin A [4]                    | 441.18527  | 442.19239 | 1.396    | -1.56        | No MS2                | NA                           |
| N-butyryl-L-homoserine lactone [4]          | 171.08936  | 204.12284 | 0.626    | -1.09        | No MS2                | NA                           |
| Palmyrrolinone [3a]                         | 237.09966  | 238.1069  | 3.443    | -1.9         | DDA for preferred ion | 30.00                        |
| Palythene [3b]                              | 284.13668  | 268.11731 | 0.792    | -1.89        | DDA for other ion     | 50.00                        |
| Pukeleimide D [4]                           | 296.10036  | 297.10764 | 0.875    | -1.59        | No MS2                | NA                           |
| Puna'auic acid [4]                          | 312.22975  | 311.22269 | 11.131   | -1.32        | DDA for preferred ion | NA (MS2 not abundant enough) |
| Sacrolide A [3b]                            | 308.19845  | 307.19138 | 9.853    | -0.34        | DDA for preferred ion | 0.00                         |
| Tricholactone [3a]                          | 254.1516   | 253.14442 | 9.877    | -1.58        | DDA for preferred ion | 81.82                        |

<sup>†</sup>NOTES: MW="molecular weight" (Da); m/z=mass to charge ratio;  $\Delta$ ppm=mass error (parts per million); RT="retention time"; MS2 DDA= "Data Dependent Acquisition" for fragment ions; FISh="Fragment Ion Search" score

Table S18: Lake Darling Tentatively Identified Compounds with annotated MS2 Spectra and structure for applicable features and identification confidence level in []  
 [D-Asp3]MC-HilR (No MS2) [4]

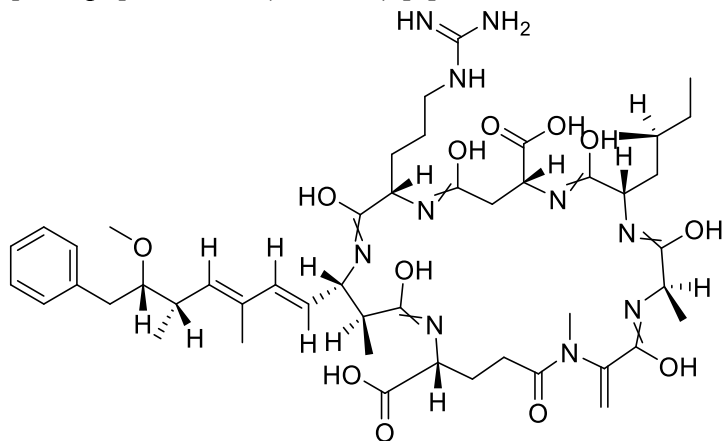

11-Carboxyanatoxin-a (No MS2) [4]

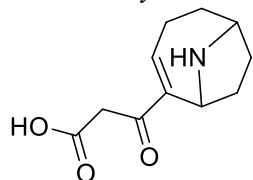

15,16-dihydrosacrolide A [3b]

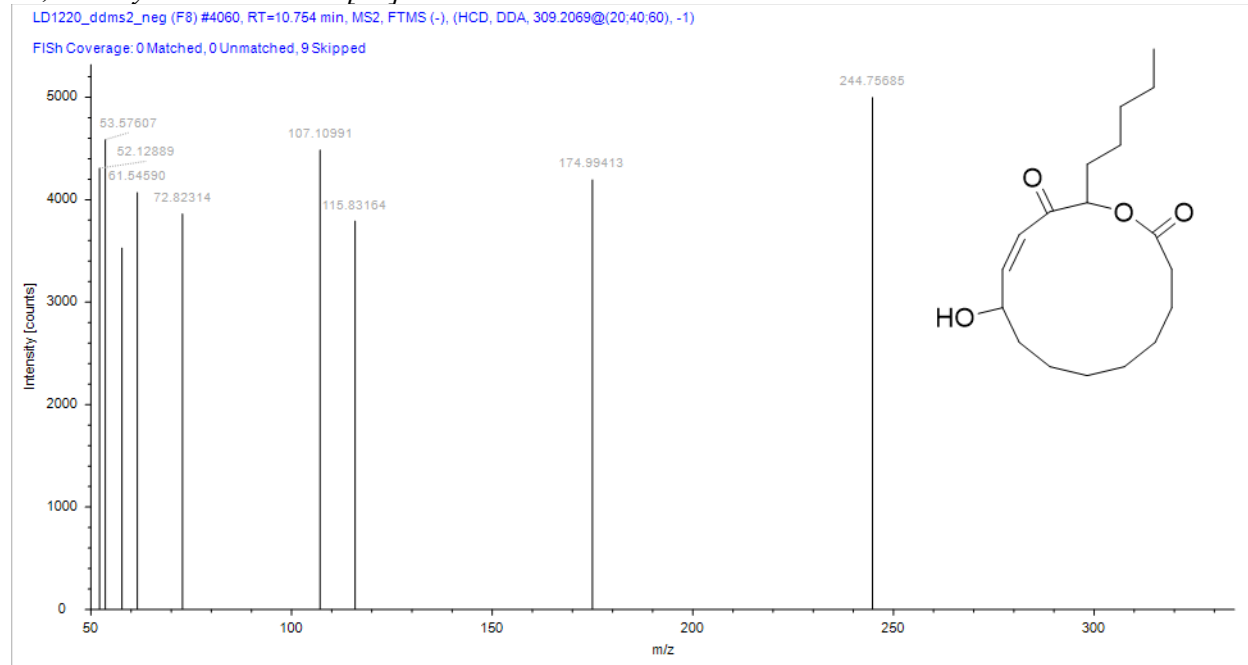

### 478-Da MAA [3b]

LD1220\_ddms2\_neg (F8) #340, RT=0.894 min, MS2, FTMS (-), (HCD, DDA, 477.1722@(20;40;60), -1)

FISH Coverage: 1 Matched, 0 Unmatched, 11 Skipped

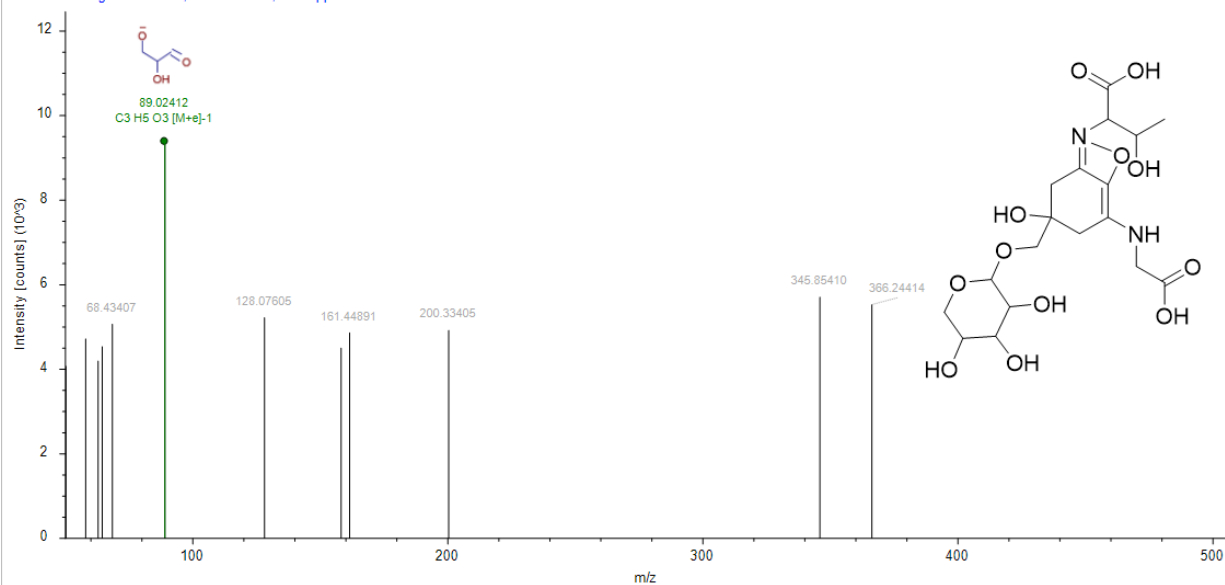

### 6-Acetamidotridecane, no MS2 [4]

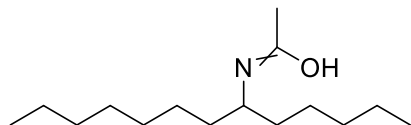

### 7-methoxy-9-methylhexadecadienoic acid [3b]

LD1500\_ddms2\_neg (F32) #4516, RT=12.337 min, MS2, FTMS (-), (HCD, DDA, 295.2275@(20;40;60), -1)

FISH Coverage: 0 Matched, 0 Unmatched, 4 Skipped

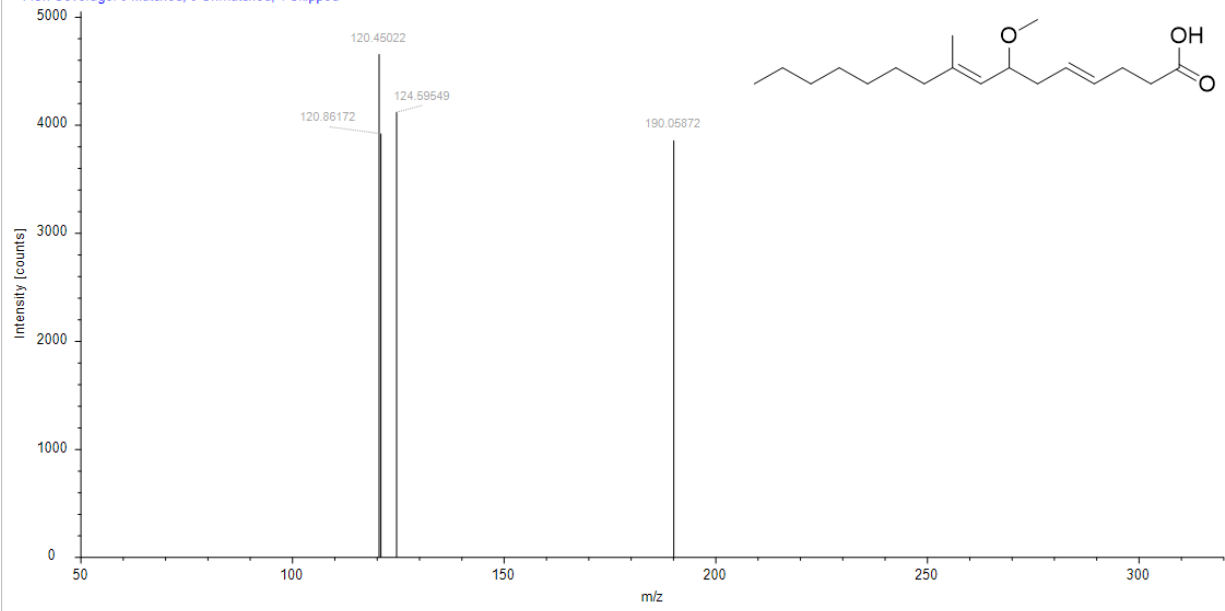

### Gloeolactone [3b]

LD1122\_ddms2\_neg (F4) #4367, RT=11.427 min, MS2, FTMS (-), (HCD, DDA, 291.1965@(20:40:60), -1)

FISH Coverage: 0 Matched, 0 Unmatched, 7 Skipped

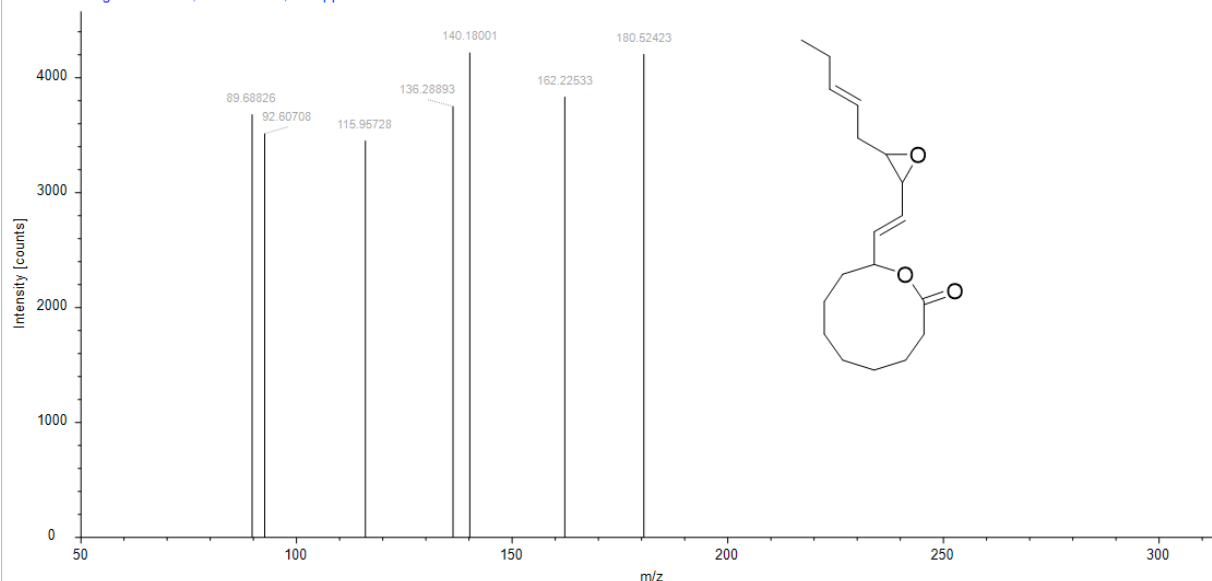

### Koshikalide [3b]

LD1415\_ddms2\_neg (F20) #3826, RT=10.375 min, MS2, FTMS (-), (HCD, DDA, 293.1758@(20:40:60), -1)

FISH Coverage: 0 Matched, 6 Unmatched, 5 Skipped

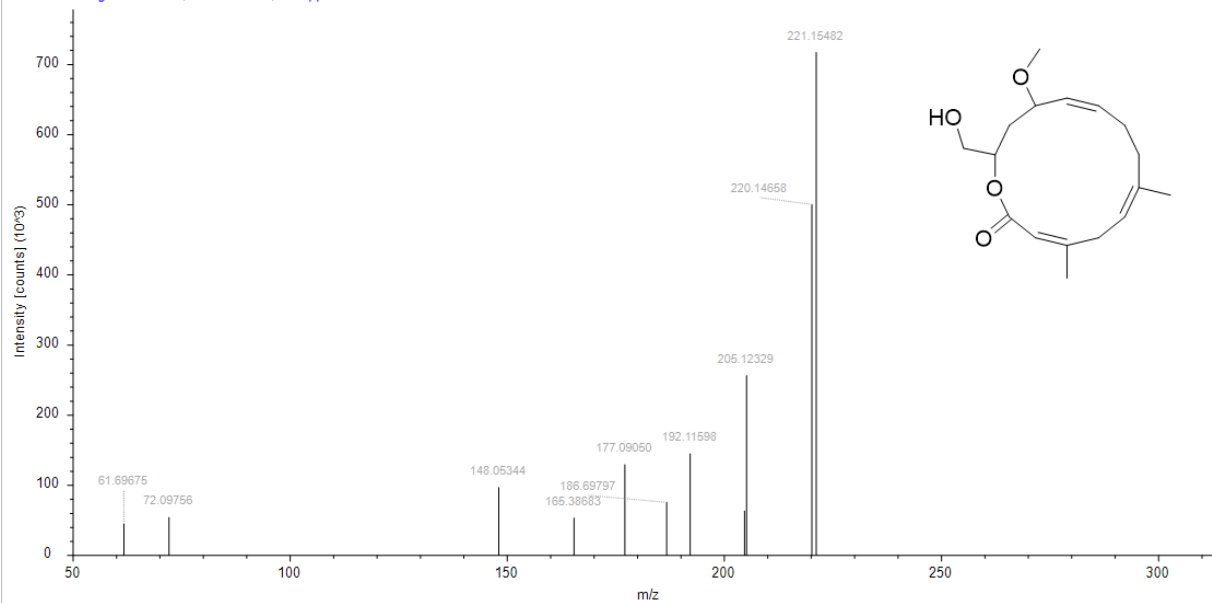

### Lyngbyacarbonate, No MS2 [4]

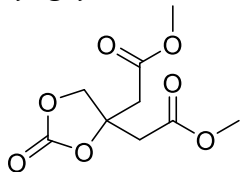



*Microcystbiopterin A* (No MS2) [4]

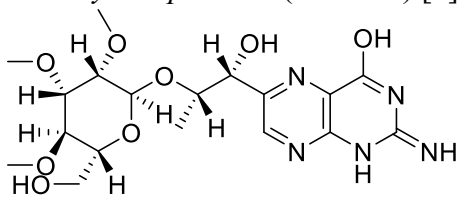

*N*-butyryl-*L*-homoserine lactone (No MS2) [4]

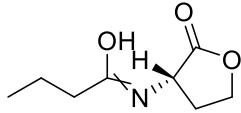

*Palmyrolinone* [3a]

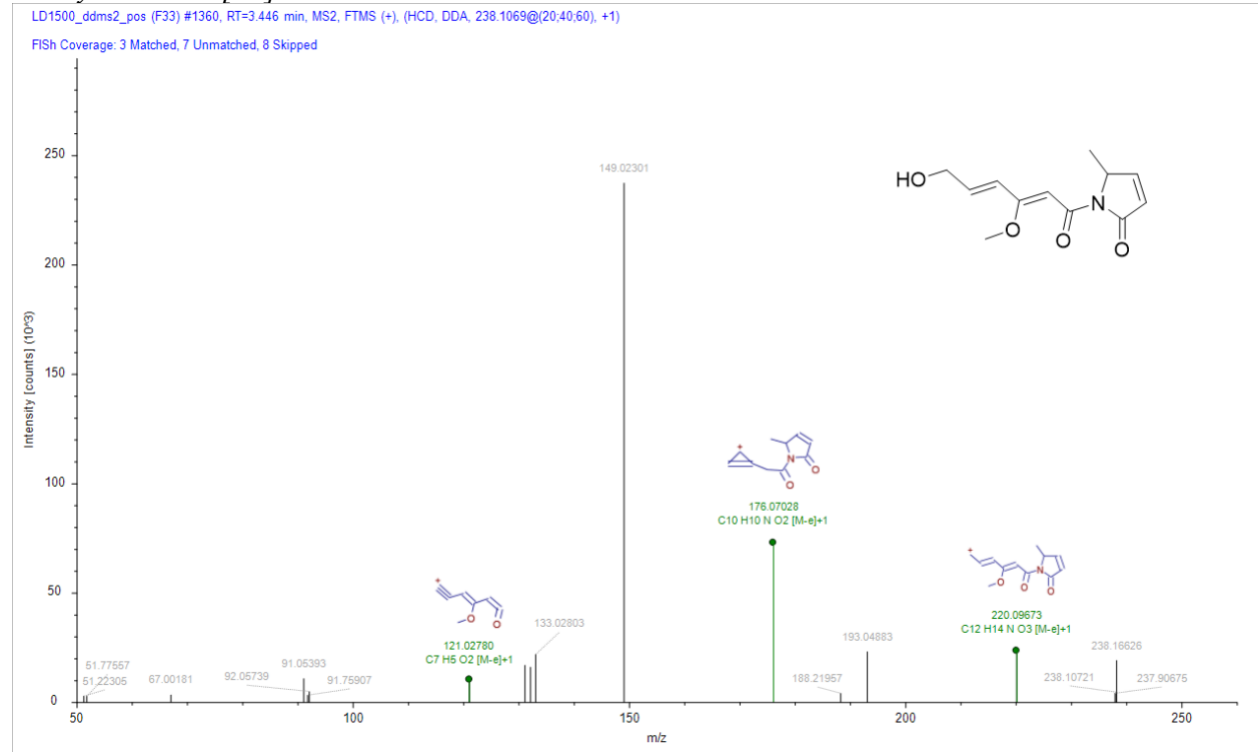

### Palythene [3b]

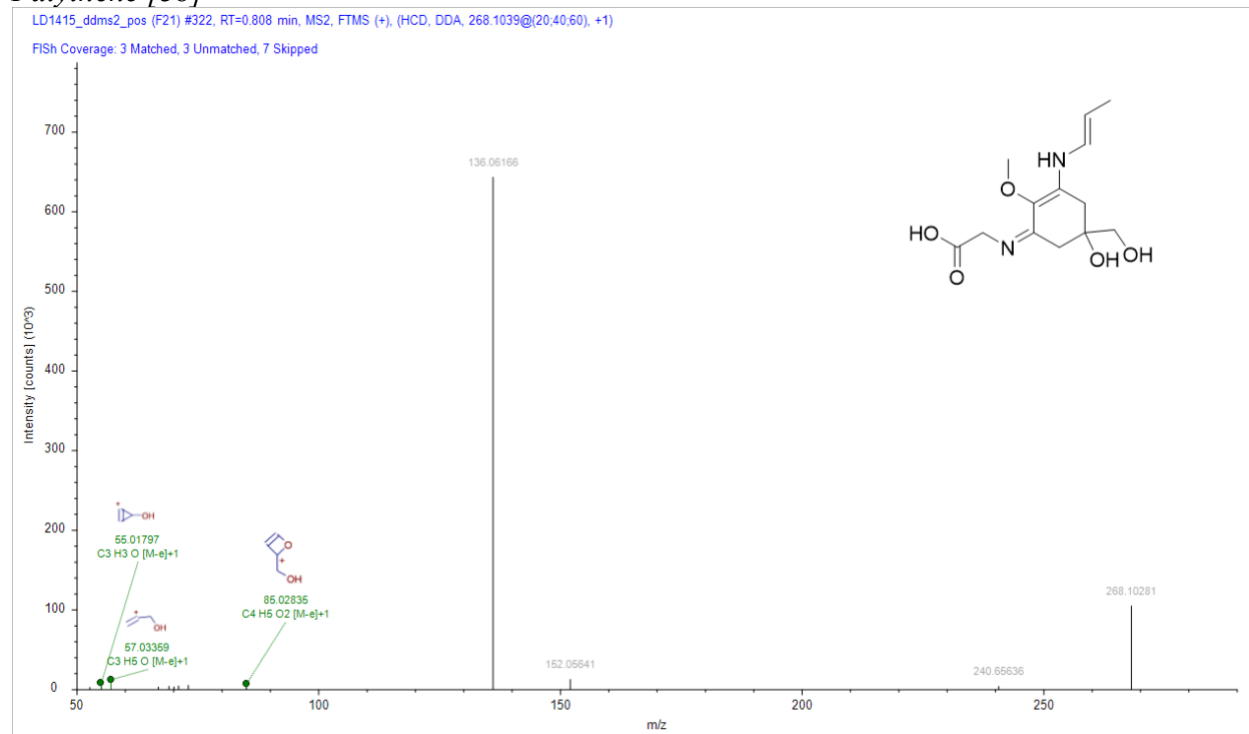

### Pukeleimide D (No MS2) [4]

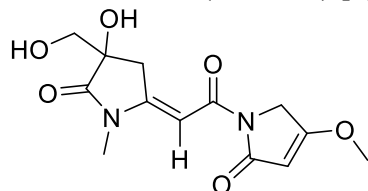

### Puna'auic acid (No MS2) [4]

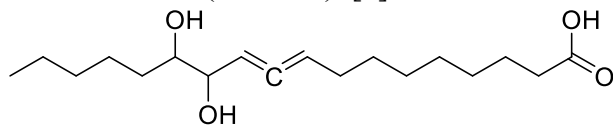

## Sacrolide A [3b]

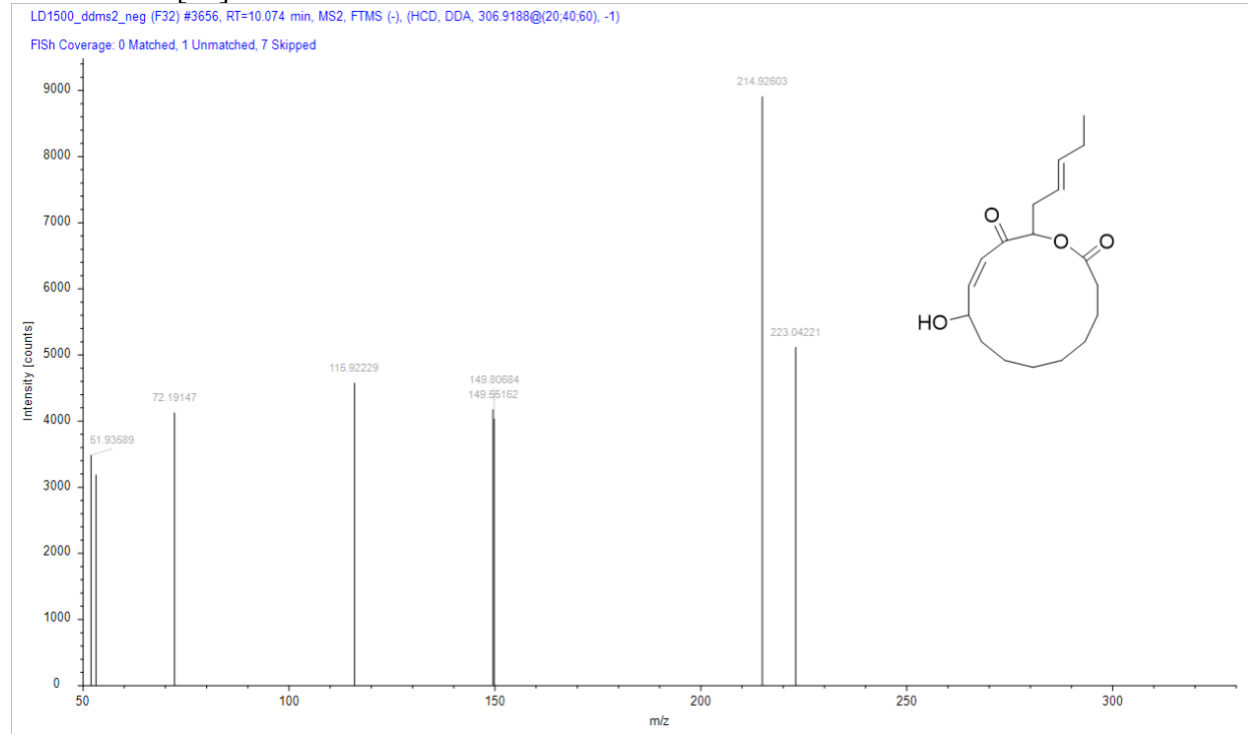

## Tricholactone [3a]

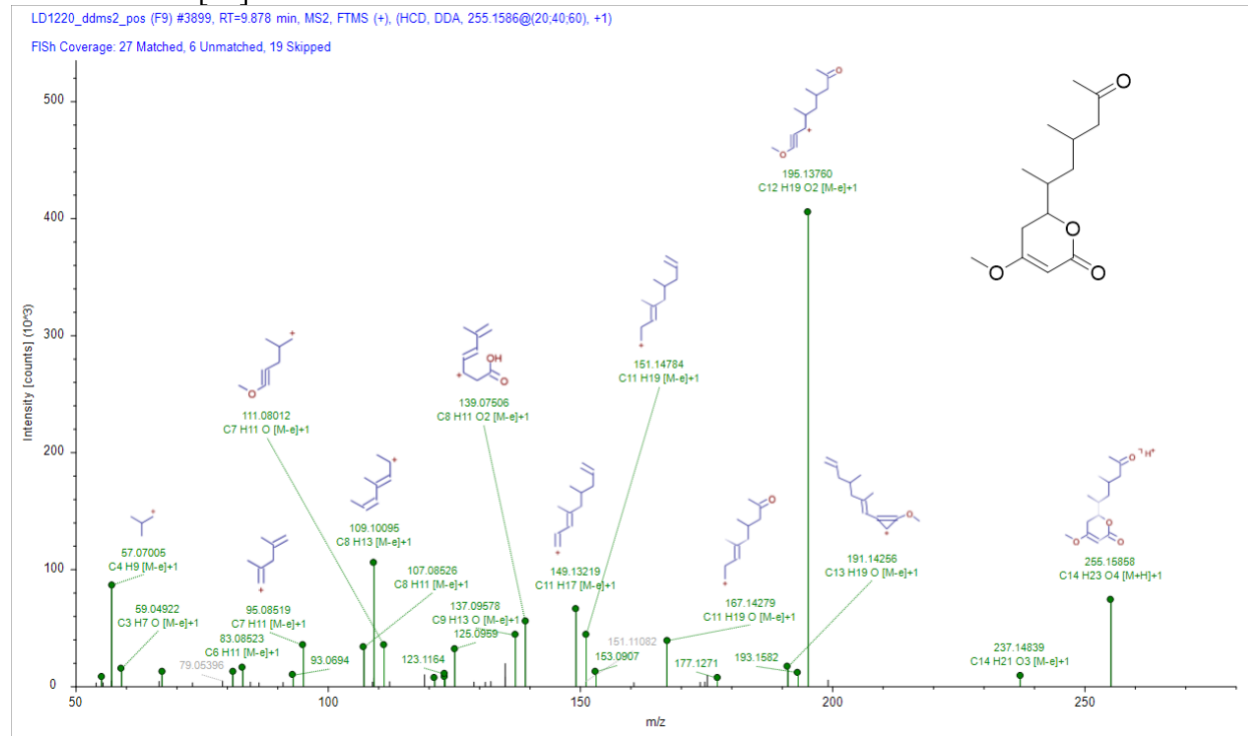

**Table S19:** Cosine theta values for the filtered (cyanometDB matched) results from Lake Darling (based on normalized responses for each feature). The green highlight indicates  $\cos(\theta) > 0.85$ .

| Times | 11:22 | 12:20 | 14:00 | 14:15 | 14:30 | 14:45 | 15:00 |
|-------|-------|-------|-------|-------|-------|-------|-------|
| 11:22 | 1.000 | 0.974 | 0.733 | 0.681 | 0.761 | 0.722 | 0.483 |
| 12:20 |       | 1.000 | 0.769 | 0.706 | 0.826 | 0.731 | 0.515 |
| 14:00 |       |       | 1.000 | 0.962 | 0.885 | 0.943 | 0.558 |
| 14:15 |       |       |       | 1.000 | 0.890 | 0.963 | 0.691 |
| 14:30 |       |       |       |       | 1.000 | 0.901 | 0.754 |
| 14:45 |       |       |       |       |       | 1.000 | 0.658 |
| 15:00 |       |       |       |       |       |       | 1.000 |

## References

1. Zaffiro, A., Rosenblum, L. & Wendelken, S. C. Method 546: Determination of total microcystins and nodularins in drinking water and ambient water by Adda enzyme-linked immunosorbent assay. *United States Environ. Prot. Agency* 1–21 (2016).
2. Peter, K. T. *et al.* Nontargeted Analysis Study Reporting Tool: A Framework to Improve Research Transparency and Reproducibility. *Anal. Chem.* **93**, 13870–13879 (2021).
3. de Jonge, N. F. *et al.* MS2Query: reliable and scalable MS2 mass spectra-based analogue search. *Nat. Commun.* **14**, 1752 (2023).
4. Wang, M. *et al.* Sharing and community curation of mass spectrometry data with Global Natural Products Social Molecular Networking. *Nat. Biotechnol.* **34**, 828–837 (2016).
